# Supplementary material
Source: ML conference proceedings conference paper supplement (https://openreview.net/forum?id=EADRzNJFn1)
Supplement: supplementary_material [file attachment]

---

# TGB 2.0: A Benchmark for Learning on Temporal Knowledge Graphs and Heterogeneous Graphs

---

Julia Gastinger<sup>1,2,6\*</sup> Shenyang Huang<sup>1,4\*</sup> Mikhail Galkin<sup>3</sup> Erfan Loghmani<sup>8</sup>

Ali Parviz<sup>1,9</sup> Farimah Poursafaei<sup>1,4</sup> Jacob Danovitch<sup>1,4</sup>

Emanuele Rossi<sup>5</sup> Ioannis Koutis<sup>9</sup> Heiner Stuckenschmidt<sup>2</sup>

Reihaneh Rabbany<sup>1,4,7</sup> Guillaume Rabusseau<sup>1,6,7</sup>

<sup>1</sup>Mila - Quebec AI Institute, <sup>2</sup>Mannheim University, <sup>3</sup>Intel AI Lab,

<sup>4</sup>School of Computer Science, McGill University, <sup>5</sup>Imperial College London,

<sup>6</sup>DIRO, Université de Montréal, <sup>7</sup>CIFAR AI Chair,

<sup>8</sup>University of Washington <sup>9</sup>New Jersey Institute of Technology

## Abstract

Multi-relational temporal graphs are powerful tools for modeling real-world data, capturing the evolving and interconnected nature of entities over time. Recently, many novel models are proposed for ML on such graphs intensifying the need for robust evaluation and standardized benchmark datasets. However, the availability of such resources remains scarce and evaluation faces added complexity due to reproducibility issues in experimental protocols. To address these challenges, we introduce Temporal Graph Benchmark 2.0 (TGB 2.0), a novel benchmarking framework tailored for evaluating methods for predicting future links on Temporal Knowledge Graphs and Temporal Heterogeneous Graphs with a focus on large-scale datasets, extending the Temporal Graph Benchmark. TGB 2.0 facilitates comprehensive evaluations by presenting eight novel datasets spanning five domains with up to 53 million edges. TGB 2.0 datasets are significantly larger than existing datasets in terms of number of nodes, edges, or timestamps. In addition, TGB 2.0 provides a reproducible and realistic evaluation pipeline for multi-relational temporal graphs. Through extensive experimentation, we observe that 1) leveraging edge-type information is crucial to obtain high performance, 2) simple heuristic baselines are often competitive with more complex methods, 3) most methods fail to run on our largest datasets, highlighting the need for research on more scalable methods.

## 1 Introduction

Learning from graph-structured data has become ubiquitous in many applications such as recommendation systems [33, 66], knowledge base completion [52, 43] and molecular learning [55, 3]. Relational data often evolves over time and can contain multiple types of relations. These complex interactions and temporal dependencies can be captured by *multi-relational* temporal graphs. In recent years, various approaches have emerged to predict future links in such graphs, notably for prediction on Temporal Knowledge Graphs (TKGs) [39, 44] and Temporal Heterogeneous Graphs (THGs) [36, 28]. These approaches capture the rich information from multi-relational data, developing distinct lines of research from that of single-relational temporal graphs [58, 47]. However,

---

\*Equal contributions

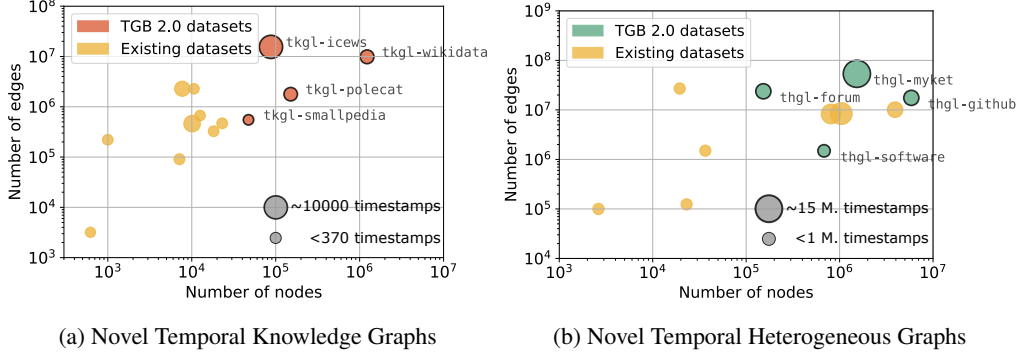

Figure 1: Existing benchmark datasets (yellow) vs. novel datasets in TGB 2.0 for TKG (a) marked in orange and THG (b) marked in green. Circle sizes correspond to the number of timestamps. TGB 2.0 datasets are significantly larger than existing datasets in number of nodes, edges and timestamps.

29 benchmarking on multi-relational temporal graphs faces two main challenges: *inconsistent evaluation*  
30 and *limited dataset size*.

31 **Inconsistent Evaluation.** Evaluation for multi-relational temporal graphs faces significant challenges.  
32 Recently, it was shown that existing evaluation for TKGs has inconsistencies in a) the evaluation  
33 metrics, b) mixing multi-step and single-step prediction settings and c) using different versions of the  
34 same dataset [14]. Similar inconsistencies have been observed in related areas such as link prediction  
35 on static knowledge graphs [64, 57], node and graph classification on static graphs [61, 11], and  
36 temporal graph link prediction [26]. In addition, for link prediction on THGs, existing evaluation often  
37 includes a single random negative per positive edge [36, 68], leading to over-optimistic performances,  
38 inconsistent evaluation, and reducing performance differentiation between methods [54].

39 **Limited Dataset Size.** Existing evaluations are conducted on predominantly small-scale datasets.  
40 For example, commonly used TKG and THG datasets consists of less than two million edges and one  
41 million nodes [36, 28, 39, 37]. However, real world networks typically contains tens of millions of  
42 nodes and edges thus existing datasets rarely reflect the true scale of datasets in practice. In addition,  
43 significant efforts were made to design scalable graph learning methods for real applications which  
44 requires the availability of large scale datasets [25, 24, 26]. These challenges hinder meaningful  
45 comparisons between methods and the accurate assessment of progress, hamper advancements in the  
46 field. Therefore, there is an urgent need for a public and standardized benchmark to facilitate proper  
47 and fair comparison between methods, accelerating research for multi-relational temporal graphs.

48 To address the aforementioned challenges, we present TGB 2.0, a novel benchmark designed for  
49 future link prediction on multi-relational temporal graphs. Building upon the foundations of the  
50 Temporal Graph Benchmark (TGB) [27] where only *single-relation temporal graphs* are included,  
51 TGB 2.0 introduces *multi-relational temporal graph* datasets. TGB 2.0 adds four novel TKG datasets  
52 and four novel THG datasets of varying scale, spanning five domains. Figure 1 shows the difference in  
53 scale of the novel datasets in TGB 2.0 when compared to existing ones. Figure 1a shows that TGB 2.0  
54 TKG datasets (marked in orange) are orders of magnitude larger than existing ones in terms of number  
55 of nodes, edges and timestamps. Figure 1b shows that TGB 2.0 THG datasets (marked in green)  
56 are significantly larger than existing datasets. With thgl-myket dataset quintupling the number  
57 of edges and timestamps while thgl-github has the most number of nodes to date. Additionally,  
58 TGB 2.0 provides an automated evaluation pipeline for reproducible and realistic evaluation on  
59 multi-relational temporal graphs. In TGB 2.0, the dynamic link property prediction task is treated  
60 as a ranking problem where multiple negative edges are ranked against the positive edge. For large  
61 datasets, we sample negative edges based on the edge type of the query, thus closely approximates  
62 the complete evaluation where all negative edges are used. Overall, TGB 2.0 presents a benchmark  
63 for realistic, challenging, and reproducible evaluation on *multi-relational temporal graphs* while  
64 providing an automated pipeline for dataset downloading, processing, evaluation as well as a public  
65 leaderboard. TGB 2.0 has the following main contributions:

- **Large and diverse datasets for multi-relational graphs.** We present four novel TKGs that are orders of magnitude larger than existing ones and four novel THGs that are significantly larger in number of nodes, edges and timestamps when compared with current ones.
  - **Realistic and reproducible evaluation.** We provide an evaluation pipeline for multi-relational temporal graphs, which automates the dataset downloading, processing and benchmarking process for seamless reproducibility. TGB 2.0 evaluation uses the ranking metric MRR and samples challenging negative edges based on the edge type information, hence providing realistic evaluation.
  - **Experimental insights.** The main insight from our experiments is that for both THGs and TKGs, all methods (apart from heuristics) fail to scale to our largest datasets, highlighting the need for more research on scalable methods. Surprisingly, the heuristic baselines perform competitively with more sophisticated methods. On THG datasets, we observe that methods that leverage the edge type and node type information achieve strong performance. Finally, across TKG datasets, we observe a strong correlation between the recurrency degree of a given relation type and the performance of methods, suggesting large room for improvement on low recurrency relations.
- Reproducibility.** TGB 2.0 code and datasets are publicly available (see Appendix D for download links) and the TGB 2.0 website provides detailed documentation.

## 2 Preliminaries

**Temporal Knowledge Graphs:** A *Temporal Knowledge Graph* (TKG)  $G_K$  is a set of quadruples  $(s, r, o, t)$  with subject and object entities  $s, o \in V$  (the set of entities), relation  $r \in R$  (the set of possible relations), and timestamp  $t$ . The semantic meaning of a quadruple  $(s, r, o, t)$  is that  $s$  is in relation  $r$  to  $o$  at time  $t$ . We also refer to quadruples as temporal triples, or simply as edges.

**Temporal Heterogeneous Graphs:** A *Temporal Heterogeneous Graph* (THG)  $G_H$  is similarly a set of quadruples,  $(s, r, o, t) \in E$  where  $s, o \in V$  are entities,  $r$  is the relation and  $t$  is a timestamp, along with a node type function  $\phi : V \rightarrow A$ . THG are equivalent to TKG with the addition that each node is assigned a fixed type (consistent over time) by the node type function.

**Temporal Graph Forecasting (Extrapolation):** Given a Temporal multi-relational Graph  $G_K$  or  $G_H$ , Temporal Graph Forecasting or Extrapolation is the task of predicting edges for *future* timestamps  $t^+$ . Akin to (static) multi-relational graph completion, temporal multi-relational graph forecasting is approached as a ranking task [19]. For a given query, e.g.  $(s, r, ?, t^+)$ , methods rank all entities in  $V$  as possible objects using a scoring function, assigning plausibility scores to each quadruple. In TGB 2.0, we focus on the temporal graph forecasting task.

**Time Representations.** There are two approaches for representing time in temporal graphs: (a) *discrete*, where graphs are modeled as snapshots  $G_t$  containing all edges appearing at time  $t$ , and (b) graphs that can be conceptualized as a series of edges arriving at *continuous* timestamps. In practice, TKGs are often represented as snapshots and TKG methods are tailored for discrete time representations [39, 37, 44, 63]. This choice is driven by the discrete nature of the data sources and the suitability of snapshot-based representations for downstream tasks. Therefore, we represent TKGs as snapshots in TGB 2.0. In comparison, THG data sources are often continuous in nature (recorded in second-wise interactions), while both discrete and continuous approaches for THGs are developed [36, 8, 68]. It is often argued that continuous representations preserves more information and can be converted to discrete while the reverse is not true [31]. Therefore, the THG datasets are represented in the continuous format.

## 3 Related Work

**TKG Methods.** Most TKG forecasting methods utilize a discrete time representation, except for [22]. Some methods integrates the message-passing paradigm from static graphs [60, 50] with sequential techniques [30, 39, 20, 21, 37, 42]. Other approaches combine Reinforcement Learning with temporal reasoning for future link prediction [38, 63]. Rule-based methods [44, 32, 49, 45, 41]

employ strategies to learn temporal logic rules while others [72, 67, 71] combines a blend of different methodologies. More details are in Appendix H.1. For TKG forecasting, common benchmark datasets include YAGO [48], WIKI [34, 29], GDELT [35] and the Integrated Crisis Early Warning System (ICEWS) dataset [6]. However, these datasets are orders of magnitude smaller than our TKG datasets in number of nodes, edges and timestamps. In `tkgl-icews`, we include the full ICEWS dataset [6] spanning 28 years when comparing to prior versions containing only one or a few years [12, 29, 9]. Similarly, our `tkgl-wikidata` dataset is orders of magnitude larger than the existing WIKI dataset [13, 40] in size of nodes, edges and timestamps.

**THG Methods.** THG methods can be categorized based on their time representation: discrete-time methods and continuous-time methods. Examples of continuous time methods include HTGN-BTW [70] and STHN [36]. HTGN-BTW [70], enabling TGN [58] to accommodate heterogeneous node and edge types. STHN [36] utilizes a link encoder and patching techniques to incorporate edge type and time information respectively. Discrete-time methods includes random walk based methods [5, 69] and message-passing based methods [68, 8]. However, it is difficult to adapt discrete-time methods for continuous-time datasets. More details are provided in Appendix H.2. Common THG datasets such as MathOverflow [53], Netflix [4] and Movielens [23] are small and only contain a few million edges [36]. Large datasets such as Dataset A and B from the WSDM 2022 Challenge and the TRACE and THEIA datasets [56] are only evaluated with one negative sample per positive edge, which is shown to lead to over-optimistic and insufficient evaluation [26, 54]. Here, we introduce the large `thgl-myket` dataset with 53 million edges and 14 million timestamps.

**Graph Learning Benchmarks.** The Open Graph Benchmark (OGB) [25] and the OGB large scale challenge [24] are popular benchmarks accelerating progress on static graphs. Recently, the Temporal Graph Benchmark was introduced for temporal graph learning, consisting of large datasets for single-relation temporal graphs [26]. In this work, we introduce novel TKG and THG datasets, incorporating multi-relational temporal graphs into TGB. Recently, detailed performance comparison for deep learning methods on dynamic graphs are conducted in [17], however multi-relational temporal graph datasets were not included in the comparison. While efforts like [14] have highlighted evaluation inconsistencies in TKG, their study focuses on existing smaller-scale datasets where no novel evaluation framework were proposed. Moreover, recent findings by [13] reveal that a simple heuristic baseline outperforms existing methods on some datasets, thus underscores the necessity for comparison with baselines. In this work, TGB 2.0 includes four novel TKG and four novel THG datasets as well as a standardized and reproducible evaluation pipeline.

## 4 Datasets

TGB 2.0 introduces eight novel datasets from five distinct domains consisting of four TKGs and four THGs. We split all datasets chronologically into training, validation, and test sets, respectively containing 70%, 15%, and 15% of all edges in line with existing studies [26, 58, 47] and ensure that edges of a timestamp can only exist in either train or validation or test set<sup>2</sup>. We present the dataset licenses and download links in Appendix E. The datasets will be permanently maintained via Digital Research Alliance of Canada (funded by the Government of Canada).

**Dataset Details.** Here we describe each TGB 2.0 dataset in detail. Temporal Knowledge Graph datasets start with the prefix `tkgl-` while Temporal Heterogeneous Graph datasets start with `thgl-`.

**`tkgl-smallpedia`.** This TKG dataset is constructed from the Wikidata Knowledge Graph [65] where it contains facts paired with Wikipedia pages. Each fact connects two entities via an explicit relation (edge type). This dataset contains Wikidata entities with IDs smaller than 1 million. The temporal relations either describe point in time relations (event-based) or relations with duration (fact-based). We also provide static relations from the same set of Wikidata pages which include 978,315 edges that can be used to enhance model performance. The task is to predict future facts.

<sup>2</sup>We detail the exact number of timestamps and edges for each subset in Appendix G.6

160 tkgl-polecat. This TKG dataset is based on the POLitical Event Classification, Attributes, and  
 161 Types (POLECAT) dataset [59] which records coded interactions between socio-political actors of  
 162 both cooperative or hostile actions. POLECAT utilizes the PLOVER ontology [18] to analyze new  
 163 stories in seven languages across the globe to generate time-stamped, geolocated events. These events  
 164 are processed automatically via NLP tools and transformer-based neural networks. This dataset  
 165 records events from January 2018 to December 2022. The task is to predict future political events  
 166 between political actors.

167 tkgl-icews. This TKG dataset is extracted from the ICEWS Coded Event Data [7, 62] which spans  
 168 a time frame from 1995 to 2022. The dataset records political events between actors. It is classified  
 169 based on the CAMEO taxonomy of events [16] which is optimized for the study of mediation and  
 170 contains a number of tertiary sub-categories specific to mediation. When compared to PLOVER  
 171 ontology in tkgl-polecat, the CAMEO codes have more event types (391 compared to 16). The  
 172 task is to predict future interactions between political actors.

173 tkgl-wikidata. This TKG dataset is extracted from the Wikidata KG [65] and constitutes a  
 174 superset of tkgl-smallpedia. The temporal relations are properties between Wikidata entities.  
 175 tkgl-wikidata is extracted from wikidata pages with IDs in the first 32 million. We also provide  
 176 static relations from the same set of Wiki pages containing 71,900,685 edges. The task is to forecast  
 177 future properties between wiki entities.

178 thgl-software. This THG dataset is based on Github data collected by GH Arxiv. Only nodes  
 179 with at least 10 edges were kept in the graph, thus resulting in 14 types of relations and 4 node types  
 180 (similar relations to [1]). The dataset spans January 2024. The task is to predict the next activity of a  
 181 given entity, e.g., which pull request the user will close at a given time.

182 thgl-forum. This THG dataset is based on the user and subreddit interaction network on Reddit [51].  
 183 The node types encode users or subreddits, the edge relations are “user reply to user” and “user -post”  
 184 in subreddits. The dataset contains interactions from January 2014. The task is to predict which user  
 185 or subreddit a user will interact with at a given time.

186 thgl-myket. This THG dataset is based on the Myket Android App market. Each edge documents  
 187 the user installation or update interaction within the Myket market. The data spans six months and  
 188 two weeks and when compared to an existing smaller version [46], this dataset contains the full data  
 189 without downsampling. Overall, the dataset includes information on 206,939 applications and over  
 190 1.3 million anonymized users from June 2020 to January 2021.

191 thgl-github. This THG dataset is based on Github data collected from the GH Arxiv. This is a  
 192 large dataset from a different period from thgl-software. We extract user, pull request, issue and  
 193 repository nodes and track 14 edge types. The nodes with two or fewer edges are filtered out. The  
 194 dataset contains the network as of March 2024. The task is to predict the next activity of an entity.

195 **Varying Scale.** Table 1 shows the detailed characteristics of all datasets, such as the number of  
 196 quadruples and nodes. TGB 2.0 datasets vary significantly in scale for number of nodes, edges, and  
 197 time steps. We observe an increase in runtime and memory requirements from tkgl-smallpedia  
 198 to tkgl-polecat to tkgl-icews and tkgl-wikidata. In practice, these requirements depend  
 199 on the combination of number of nodes, edges and time steps. To account for such benchmarking  
 200 requirements, we categorize the datasets into **small**, **medium** and **large** datasets. Small datasets  
 201 are suitable for prototyping methods, while medium and large datasets test method performance at  
 202 increasingly large scales.

203 Table 1 reports dataset statistics: the *Proportion of Inductive Test Nodes (Induct. Test Nodes)* is the  
 204 proportion of nodes in the test set that have not been seen during training. The *Recurrency Degree*  
 205 (*Rec*), which is defined as the fraction of test temporal triples  $(s, r, o, t^+)$  for which there exists a  
 206  $k < t^+$  such that  $(s, r, o, k) \in G$ . The *Direct Recurrency Degree (DRec)* which is the fraction of  
 207 temporal triples  $(s, r, o, t^+)$  for which it holds that  $(s, r, o, t^+ - 1) \in G$  [13]. Also, we represent a  
 208 novel metric called *Consecutiveness Value (Con)*, which quantifies if a given temporal triples repeats  
 209 at consecutive timestamps by averaging the maximum number of consecutive timestamps during which

Table 1: Dataset information including common statistics and the proportion of Inductive Test nodes (Induct. Test Nodes), the Direct Recurrency Degree (DRec), the Recurrency Degree (Rec), the Consecutiveness Value (Con), as well as the mean number of edges and nodes per timestep (Mean Edges/Ts. and Mean Nodes/Ts.)

|                    | Temporal Knowledge Graphs (tkgl-) |           |            |           | Temporal Heterogeneous Graphs (thgl-) |            |            |            |
|--------------------|-----------------------------------|-----------|------------|-----------|---------------------------------------|------------|------------|------------|
| Dataset            | smallpedia                        | polecat   | icews      | wikidata  | software                              | forum      | github     | myket      |
| Domain             | knowledge                         | political | political  | knowledge | software                              | social.    | software   | interac.   |
| # Quadruples       | 550,376                           | 1,779,610 | 15,513,446 | 9,856,203 | 1,489,806                             | 23,757,707 | 17,499,577 | 53,632,788 |
| # Nodes            | 47,433                            | 150,931   | 87,856     | 1,226,440 | 681,927                               | 152,816    | 5,856,765  | 1,530,835  |
| # Edge Types       | 283                               | 16        | 391        | 596       | 14                                    | 2          | 14         | 2          |
| # Node Types       | -                                 | -         | -          | -         | 4                                     | 2          | 4          | 2          |
| # Timesteps        | 125                               | 1,826     | 10,224     | 2,025     | 689,549                               | 2,558,457  | 2,510,415  | 14,828,090 |
| Granularity        | year                              | day       | day        | year      | second                                | second     | second     | second     |
| Induct. Test Nodes | 0.26                              | 0.12      | 0.05       | 0.34      | 0.13                                  | 0.02       | 0.14       | 0.01       |
| DRec               | 0.71                              | 0.07      | 0.11       | 0.61      | 0.00                                  | 0.00       | 0.00       | 0.00       |
| Rec                | 0.72                              | 0.43      | 0.63       | 0.61      | 0.10                                  | 0.63       | 0.01       | 0.37       |
| Con                | 5.82                              | 1.07      | 1.14       | 5.05      | 1.00                                  | 1.00       | 1.00       | 1.00       |
| Mean Edges/Ts.     | 4,403.01                          | 974.59    | 1,516.91   | 4,867.26  | 0.56                                  | 8.87       | 6.54       | 3.15       |
| Mean Nodes/Ts.     | 5,289.16                          | 550.60    | 1,008.65   | 5,772.16  | 0.86                                  | 12.96      | 9.77       | 6.24       |

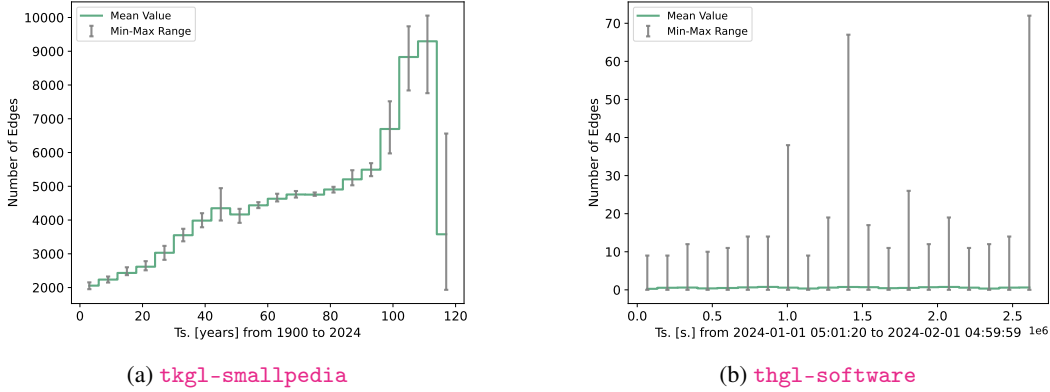

Figure 2: Number of edges over time

210 a triple holds true across all triples in the dataset. Intuitively, fact-based relations which are true  
211 across multiple consecutive time steps will result in a higher *Consecutiveness Value*.

212 **Diverse Statistics.** TGB 2.0 datasets exhibits diverse dataset statistics. For example,  
213 tkgl-wikidata, tkgl-smallpedia, tkgl-polecat and thgl-software all have more than  
214 10% test nodes that are inductive (i.e. nodes unseen in the training set), thus testing the inductive  
215 capability of methods. Variations in the recurrence of relations are evident with tkgl-smallpedia  
216 and tkgl-wikidata showing higher Recurrency Degrees compared to others. The DRec highlights  
217 the disparities between THG and TKG datasets, where the finer, second-wise time granularity of THG  
218 leads to a DRec of 0 implying no repetition of facts across subsequent time steps. On TKG datasets,  
219 the high Consecutiveness Value for tkgl-smallpedia and tkgl-wikidata exhibit a prevalence  
220 of long-lasting facts, contrasting with tkgl-icews and tkgl-polecat which documents political  
221 events. In comparison, THG datasets describe one-time events, thus displaying lower Con values.

222 Figure 2 shows the number of edges per timestamp for tkgl-smallpedia and thgl-software,  
223 reported over twenty bins with bars showing the min/max in each bin. Similar figures for other datasets  
224 are given in Appendix F. Figure 2 underscores distinctions between datasets, particularly in terms of  
225 time granularity and trend patterns. TKG datasets demonstrate a coarser time granularity leading to a  
226 significantly higher edge count per timestep compared to THG datasets. thgl-software exhibits  
227 relatively constant number of edges over time (with peaks at specific time points). In comparison,  
228 tkgl-smallpedia exhibit significant growth in edge count closer to the end. This is because  
229 tkgl-smallpedia starts from 1900 and ends at 2024, as time gets closer to current era, the amount  
230 of digitized and documented information increases significantly. The reduced number of edges in the  
231 final bin is due to the fact that the knowledge from 2024 remains incomplete as of this writing.

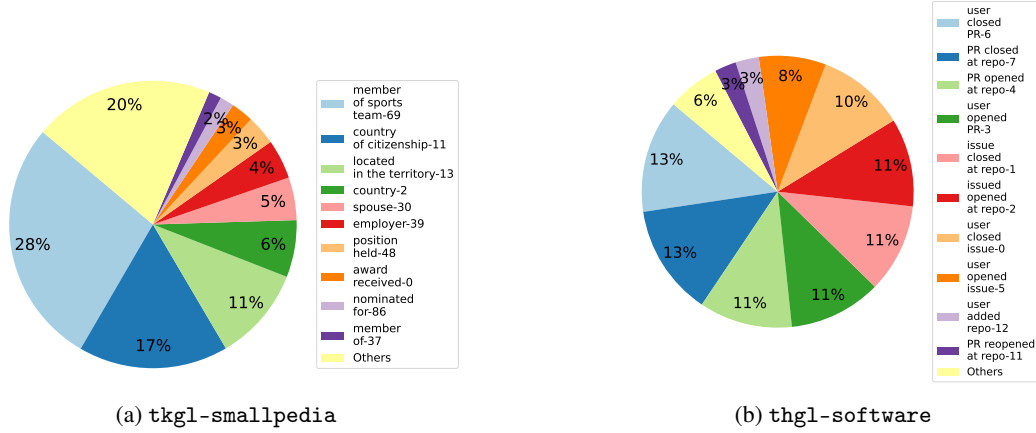

Figure 3: Most frequent relation types for tkgl-smallpedia and thgl-software datasets. *Others* refers to all remaining relations not shown here.

Figure 3 illustrates the distribution of the ten most prominent relations in tkgl-smallpedia and thgl-software. More Figures are in Appendix F. There are highly frequent relation types in tkgl-smallpedia such as member of sports team which occupies 28% of all edges; the portion of edges quickly reduces for other relations. In thgl-software, there is a relatively even split in the portion of edges for the most prominent relations with the top seven relations each occupying more than 10% of edges. These figure show the diversity of relations and their distributions in TGB 2.0.

## 5 Experiments

**Evaluation Protocol.** In TGB 2.0, we focus on the *dynamic link property prediction task* where the goal is to predict the property (often existence) of a link between a pair of nodes in a future timestamp. Here, we treat the link prediction task as ranking problem similar to [25, 26, 14]. The model is required to assign the true edge with the highest probability from multiple negative edges (also referred to as corrupted triples in the TKG literature). The evaluation metric is the time-aware filtered Mean Reciprocal Rank (MRR) following [14, 26]. The MRR computes the average of the reciprocals of the ranks of the first relevant item in a list of results. The time-aware filtered MRR removes any edge that are known to be true at the same time as the true edge (i.e. temporal conflicts) from the list of possible destinations. For THG datasets, we predict the tails of queries  $(s, r, ?, t^+)$ , as in [36, 58]. Following the practice in TKG literature [14], we predict entities in both directions for TKG datasets, namely both  $(s, r, ?, t^+)$  and  $(?, r, o, t^+)$ , achieved by introducing inverse relations where the head and tail of an existing relation is inverted. Due to the large size of TGB 2.0 datasets, we select the number of negative edges  $q$  for each dataset considering the trade-off between the evaluation completeness and the test inference time. Therefore, we utilize two negative sampling strategies for evaluation: *1-vs-all* and *1-vs-q*. For both strategies, the temporal conflicts are removed for correctness. All negative samples are then pre-generated to ensure reproducible evaluation. Lastly, any methods that uses more than 40 GB GPU memory or runs for more than a week are considered as Out Of Memory (OOM) or Out Of Time (OOT), respectively.

*1-vs-all.* For datasets where there is a small number of nodes, it is possible to evaluate with all the possible destinations, thus achieving a comprehensive evaluation. In TGB 2.0, we use *1-vs-all* strategy for tkgl-smallpedia, tkgl-polecat and tkgl-icews due to their smaller node size (see Table 1).

*1-vs-q.* For datasets with a large number of nodes, sampling  $q$  negative edges is required to achieve a practically feasible inference time. We find that randomly sampling the negative edges, omitting the edge types, results in over-optimistic MRRs, making the prediction easy. We thus propose to incorporate the edge type information into the negative sampling process for more robust evaluation. For the large TKG dataset tkgl-wikidata, we first identify possible tails for each edge type



Table 2: **MRR** results for *Temporal Knowledge Graph* link property prediction task. We report the average and standard deviation across 5 different runs. First place is **bolded** and second place is underlined.

| Method                       | tkgl-smallpedia     |                     | tkgl-polecat        |                     | tkgl-icews          |                     | tkgl-wikidata |       |
|------------------------------|---------------------|---------------------|---------------------|---------------------|---------------------|---------------------|---------------|-------|
|                              | Validation          | Test                | Validation          | Test                | Validation          | Test                | Validation    | Test  |
| EdgeBank <sub>tw</sub> [54]  | 0.457               | 0.353               | 0.058               | 0.056               | 0.020               | 0.020               | 0.633         | 0.535 |
| EdgeBank <sub>∞</sub> [54]   | 0.401               | 0.333               | 0.048               | 0.045               | 0.008               | 0.009               | 0.632         | 0.535 |
| RecB <sub>train</sub> [13]   | <b>0.694</b>        | <b>0.655</b>        | 0.203               | <u>0.198</u>        | OOT                 | OOT                 | OOT           | OOT   |
| RecB <sub>default</sub> [13] | 0.640               | 0.570               | 0.170               | 0.167               | 0.264               | <b>0.206</b>        | OOT           | OOT   |
| RE-GCN [39]                  | 0.631±0.001         | 0.594±0.001         | 0.191±0.003         | 0.175±0.002         | 0.232±0.003         | 0.182±0.003         | OOM           | OOM   |
| CEN [37]                     | <u>0.646</u> ±0.001 | <u>0.612</u> ±0.001 | <u>0.204</u> ±0.002 | 0.184±0.002         | 0.244±0.002         | <u>0.187</u> ±0.003 | OOM           | OOM   |
| TLogic [44]                  | 0.631±0.000         | 0.595±0.001         | <b>0.236</b> ±0.001 | <b>0.228</b> ±0.001 | <b>0.287</b> ±0.001 | 0.186±0.001         | OOT           | OOT   |

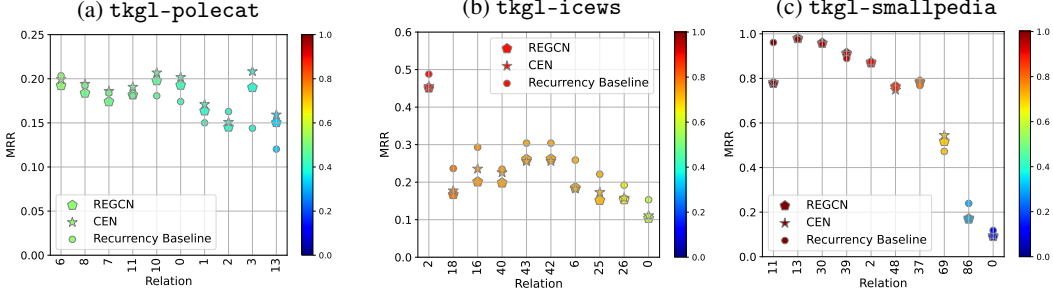

Figure 4: MRR per relation for the 10 highest occurring relations for three TKG datasets for RE-GCN, CEN and Recurrency Baseline. The color indicates the Recurrency Degree value for relation type. The relations for each dataset are ordered by decreasing Recurrency Degrees.

throughout the dataset and then sample the negatives based on the edge type of the query. If there are not enough tails in a given edge type, we then randomly sample the remaining ones. For all THG datasets, we sample all destination nodes with the same node type as the true destination node, thus considering the tail node type associated with a given edge type. We conduct an ablation study to show the effectiveness of our sampling strategy in Appendix G.5 on the tkgl-smallpedia dataset. We find that our sampling results in closer MRR to that of the *1-vs-all* than random sampling.

## 5.1 Temporal Knowledge Graph Experiments

For TKG experiments, we include RE-GCN [39], TLogic [44], CEN [37] as well as two deterministic heuristic baselines: the Recurrency Baseline (RecB) [13] and EdgeBank [54]. For RecB, we report two versions where applicable: RecB<sub>default</sub> which uses default values for its two parameters, and RecB<sub>train</sub> which selects the optimal values for these based on performance on the validation set. For EdgeBank, we report two versions following [54], EdgeBank<sub>tw</sub>, which accounts for information from a fixed past time window, and EdgeBank<sub>∞</sub>, which uses information from all past temporal triples. Method details and compute resources are in Appendix H.1 and Appendix G.1, respectively.

We report the average performance and standard deviation across 5 runs for each method in Table 2. The runtimes and GPU usage results are in Appendix G.3 and G.2. In particular, several methods encountered out of memory or out of time errors on some datasets. The results reveals that no single method exhibits superior performance across all four datasets. Surprisingly, the RecB heuristic performs competitively across most datasets while being among the best performing on tkgl-smallpedia and tkgl-icews, underscoring the importance of including simple baselines in comparison and suggesting potential areas for improvement in other methods. The Edgebank heuristic, originally designed for homogenous temporal graphs, exhibits low performance, highlighting the importance of utilizing the rich multi-relational information for TKG learning. On the large tkgl-wikidata dataset, however, Edgebank is the only method that can scale to such size, likely due to the fact that it omits edge type information. This highlights the need for scalable methods. On another note, methods achieve higher MRRs on datasets characterized by high Recurrency Degrees and Consecutiveness values (tkgl-smallpedia, tkgl-wikidata), despite the presence of a considerable number of inductive nodes in these datasets.



Table 3: **MRR** results for *Temporal Heterogeneous Graph Link Prediction* task. We report the average and standard deviation across 5 different runs. First place is **bolded** and second place is underlined.

| Method                       | thgl-software      |                    | thgl-forum         |                    | thgl-github |       | thgl-myket |       |
|------------------------------|--------------------|--------------------|--------------------|--------------------|-------------|-------|------------|-------|
|                              | Validation         | Test               | Validation         | Test               | Validation  | Test  | Validation | Test  |
| EdgeBank <sub>rw</sub> [54]  | 0.279              | 0.288              | 0.534              | 0.534              | 0.355       | 0.374 | 0.248      | 0.245 |
| EdgeBank <sub>∞</sub> [54]   | <u>0.399</u>       | <u>0.449</u>       | 0.612              | 0.617              | 0.403       | 0.413 | 0.430      | 0.456 |
| RecB <sub>default</sub> [13] | 0.106              | 0.099              | 0.552              | 0.561              | OOT         | OOT   | OOT        | OOT   |
| TGN [58]                     | 0.299±0.012        | 0.324±0.017        | <u>0.598±0.086</u> | <u>0.649±0.097</u> | OOM         | OOM   | OOM        | OOM   |
| TGN <sub>edge-type</sub>     | 0.376±0.010        | 0.424±0.013        | <b>0.767±0.005</b> | <b>0.729±0.009</b> | OOM         | OOM   | OOM        | OOM   |
| STHN [36]                    | <b>0.764±0.025</b> | <b>0.731±0.005</b> | OOM                | OOM                | OOM         | OOM   | OOM        | OOM   |

**Per-relation Analysis.** Figure 4 illustrates the performance per relation of selected methods across three datasets <sup>3</sup>. For each dataset we show the ten most frequent relations, ordered by decreasing Recurrency Degree with the color reflecting the Recurrency Degree of each relation. Note that the y-axis scale varies across datasets. We observe distinct patterns in relation-specific performance across datasets: while results on `thgl-polecat` exhibit consistent performance levels across relations, suggesting a relative homogeneity, results on the `thgl-smallpedia` dataset shows significant variance in performance, indicating a higher degree of variation among relations. Interestingly, there is strong correlation between the Recurrency Degree and performance, most evident within the `thgl-smallpedia` dataset.

## 5.2 Temporal Heterogenous Graph Experiments

For THG experiments, we include TGN [58] (with and without edge type information), STHN [36], RecB [13], and EdgeBank [54] for comparison. Table 3 reports the average performance and standard deviation across 5 runs for each method. We observe that scalability is a significant challenge for THG methods on large datasets such as `thgl-forum` and `thgl-myket`, more details can be found in Appendix G. Most methods either are out of memory or out of time for these datasets. STHN achieves the highest performance on `thgl-software` dataset showing method designed for THG can achieve significant performance gain. However, STHN is the least scalable, requiring 185 GB of memory for `thgl-software` to compute subgraphs and unable to scale to other datasets. The widely-used TGN model [58] for single-relation temporal graph learning is also adapted here, with a modification where it incorporates the edge type information as edge feature. We observe significant improvement when TGN utilizes edge type data, thus highlighting the potential to leverage the multi-relational information in THGs. Lastly, the EdgeBank heuristic achieves competitive performance with that of TGN while being scalable to large datasets. Therefore, it is important to evaluate against simple baselines to understand method performances.

## 6 Conclusion

In this work, we introduce TGB 2.0, a novel benchmark for reproducible, realistic, and robust evaluation on multi-relational temporal graphs that is building on the Temporal Graph Benchmark (TGB). We present four new TKG datasets and four new THG datasets which introduce multi-relation datasets in TGB. TGB 2.0 datasets are significantly larger than existing ones while being diverse in statistics and dataset domain. TGB 2.0 focuses on the dynamic link property prediction tasks and provides an automated machine learning pipeline for dataset downloading, processing, method evaluation, and a public leaderborad to track recent progress. From our experiments, we find that both TKG and THG methods struggle to tackle large scale datasets in TGB 2.0, often resulting in overly long runtime or exceeding the memory limit. Therefore, scalability is an important future direction. Another observation is that heuristic methods achieve competitive results on TKG and THG datasets. This highlights the importance of the inclusion of simple baselines and underlines the room for improvement for current methods.

<sup>3</sup>The relation description can be found based on their relation ID in Figure 7 in Appendix.

## Acknowledgment

The authors extend their gratitude to Myket Corporation for generously providing the anonymous interaction data utilized in this research. We are thankful to Dr. Vahid Rahimian for agreeing to collaborate and for their support throughout the data-sharing process and to Ms. Zahra Eskandari for her diligent efforts in collecting and arranging the data. Additionally, we thank MohammadAmin Fazli for his continuous support and help in facilitating collaboration and data sharing. We thank Weihua Hu, Matthias Fey, Jure Leskovec and Michael Bronstein from the TGB team for their support and discussion. We thank the OGB team for sharing their website template for the TGB website. This research was enabled in part by compute resources, software and technical help provided by Mila. This research was supported by the Canadian Institute for Advanced Research (CIFAR AI chair program), Natural Sciences and Engineering Research Council of Canada (NSERC) Postgraduate Scholarship Doctoral (PGS D) Award and Fonds de recherche du Québec - Nature et Technologies (FRQNT) Doctoral Award.

## References

- [1] Kian Ahrabian, Daniel Tarlow, Hehuimin Cheng, and Jin LC Guo. Software engineering event modeling using relative time in temporal knowledge graphs. *arXiv preprint arXiv:2007.01231*, 2020.
- [2] Mubashara Akhtar, Omar Benjelloun, Costanza Conforti, Pieter Gijsbers, Joan Giner-Miguel, Nitisha Jain, Michael Kuchnik, Quentin Lhoest, Pierre Marcenac, Manil Maskey, et al. Croissant: A metadata format for ml-ready datasets. In *Proceedings of the Eighth Workshop on Data Management for End-to-End Machine Learning*, pages 1–6, 2024.
- [3] Dominique Beaini, Shenyang Huang, Joao Alex Cunha, Zhiyi Li, Gabriela Moisescu-Pareja, Oleksandr Dymov, Samuel Maddrell-Mander, Callum McLean, Frederik Wenkel, Luis Müller, et al. Towards foundational models for molecular learning on large-scale multi-task datasets. In *The Twelfth International Conference on Learning Representations*, 2023.
- [4] James Bennett, Stan Lanning, et al. The netflix prize. In *Proceedings of KDD cup and workshop*, volume 2007, page 35. New York, 2007.
- [5] Ranran Bian, Yun Sing Koh, Gillian Dobbie, and Anna Divoli. Network embedding and change modeling in dynamic heterogeneous networks. In *Proceedings of the 42nd International ACM SIGIR Conference on Research and Development in Information Retrieval*, pages 861–864, 2019.
- [6] Elizabeth Boschee, Jennifer Lautenschlager, Sean O’Brien, Steve Shellman, James Starz, and Michael Ward. ICEWS Coded Event Data, 2015.
- [7] Elizabeth Boschee, Jennifer Lautenschlager, Sean O’Brien, Steve Shellman, James Starz, and Michael Ward. ICEWS Coded Event Data, 2015.
- [8] Manuel Dileo, Matteo Zignani, and Sabrina Gaito. Durendal: Graph deep learning framework for temporal heterogeneous networks. *arXiv preprint arXiv:2310.00336*, 2023.
- [9] Zifeng Ding, Heling Cai, Jingpei Wu, Yunpu Ma, Ruotong Liao, Bo Xiong, and Volker Tresp. zrlm: Zero-shot relational learning on temporal knowledge graphs with large language models. In *NAACL*, 2024.
- [10] Vijay Prakash Dwivedi, Ladislav Rampášek, Michael Galkin, Ali Parviz, Guy Wolf, Anh Tuan Luu, and Dominique Beaini. Long range graph benchmark. *Advances in Neural Information Processing Systems*, 35:22326–22340, 2022.
- [11] Federico Errica, Marco Podda, Davide Bacciu, and Alessio Micheli. A fair comparison of graph neural networks for graph classification. In *8th International Conference on Learning Representations (ICLR)*, 2020.

- [12] Alberto García-Durán, Sebastijan Dumančić, and Mathias Niepert. Learning sequence encoders for temporal knowledge graph completion. In *Proceedings of the 2018 Conference on Empirical Methods in Natural Language Processing*, pages 4816–4821, Brussels, Belgium, October–November 2018. Association for Computational Linguistics.
- [13] Julia Gastinger, Christian Meilicke, Federico Errica, Timo Sztyler, Anett Schuelke, and Heiner Stuckenschmidt. History repeats itself: A baseline for temporal knowledge graph forecasting. In *Proceedings of the Thirty-Third International Joint Conference on Artificial Intelligence, IJCAI 2024, Jeju, South Korea, 2024*.
- [14] Julia Gastinger, Timo Sztyler, Lokesh Sharma, Anett Schuelke, and Heiner Stuckenschmidt. Comparing apples and oranges? On the evaluation of methods for temporal knowledge graph forecasting. In *Joint European Conference on Machine Learning and Knowledge Discovery in Databases (ECML PKDD)*, pages 533–549, 2023.
- [15] Timnit Gebru, Jamie Morgenstern, Briana Vecchione, Jennifer Wortman Vaughan, Hanna Wallach, Hal Daumé Iii, and Kate Crawford. Datasheets for datasets. *Communications of the ACM*, 64(12):86–92, 2021.
- [16] Deborah J Gerner, Philip A Schrod, Omür Yilmaz, and Rajaa Abu-Jabr. Conflict and mediation event observations (cameo): A new event data framework for the analysis of foreign policy interactions. *International Studies Association, New Orleans*, 2002.
- [17] Alessio Gravina and Davide Bacciu. Deep learning for dynamic graphs: Models and benchmarks. *IEEE Transactions on Neural Networks and Learning Systems*, 2024.
- [18] Andrew Halterman, Benjamin E Bagozzi, Andreas Beger, Phil Schrod, and Grace Scraborough. Plover and polecat: A new political event ontology and dataset. In *International Studies Association Conference Paper*, 2023.
- [19] Zhen Han. *Relational learning on temporal knowledge graphs*. Phd thesis, Ludwig-Maximilians-University, Munich, Germany, 2022.
- [20] Zhen Han, Peng Chen, Yunpu Ma, and Volker Tresp. Explainable subgraph reasoning for forecasting on temporal knowledge graphs. In *9th International Conference on Learning Representations (ICLR)*, 2021.
- [21] Zhen Han, Zifeng Ding, Yunpu Ma, Yujia Gu, and Volker Tresp. Learning neural ordinary equations for forecasting future links on temporal knowledge graphs. In *Proceedings of the 2021 Conference on Empirical Methods in Natural Language Processing (EMNLP)*, pages 8352–8364, 2021.
- [22] Zhen Han, Yunpu Ma, Yuyi Wang, Stephan Günnemann, and Volker Tresp. Graph hawkes neural network for forecasting on temporal knowledge graphs. In Dipanjan Das, Hannaneh Hajishirzi, Andrew McCallum, and Sameer Singh, editors, *Conference on Automated Knowledge Base Construction, AKBC 2020, Virtual, June 22-24, 2020*, 2020.
- [23] F Maxwell Harper and Joseph A Konstan. The movielens datasets: History and context. *Acm transactions on interactive intelligent systems (tiis)*, 5(4):1–19, 2015.
- [24] Weihua Hu, Matthias Fey, Hongyu Ren, Maho Nakata, Yuxiao Dong, and Jure Leskovec. Ogb-lsc: A large-scale challenge for machine learning on graphs. In *Proceedings of the Neural Information Processing Systems Track on Datasets and Benchmarks*, 2021.
- [25] Weihua Hu, Matthias Fey, Marinka Zitnik, Yuxiao Dong, Hongyu Ren, Bowen Liu, Michele Catasta, and Jure Leskovec. Open graph benchmark: Datasets for machine learning on graphs. In *Advances in Neural Information Processing Systems 33: Annual Conference on Neural Information Processing Systems 2020*, volume 33, 2020.

- [26] Shenyang Huang, Farimah Poursafaei, Jacob Danovitch, Matthias Fey, Weihua Hu, Emanuele Rossi, Jure Leskovec, Michael Bronstein, Guillaume Rabusseau, and Reihaneh Rabbany. Temporal graph benchmark for machine learning on temporal graphs. In *37th Conference on Neural Information Processing Systems (NeurIPS), Datasets and Benchmarks Track*, 2023.
- [27] Shenyang Huang, Farimah Poursafaei, Jacob Danovitch, Matthias Fey, Weihua Hu, Emanuele Rossi, Jure Leskovec, Michael M. Bronstein, Guillaume Rabusseau, and Reihaneh Rabbany. Temporal graph benchmark for machine learning on temporal graphs. In *Advances in Neural Information Processing Systems 36: Annual Conference on Neural Information Processing Systems 2023*, 2023.
- [28] Yugang Ji, Tianrui Jia, Yuan Fang, and Chuan Shi. Dynamic heterogeneous graph embedding via heterogeneous hawkes process. In *Machine Learning and Knowledge Discovery in Databases. Research Track: European Conference, ECML PKDD 2021, Bilbao, Spain, September 13–17, 2021, Proceedings, Part I 21*, pages 388–403. Springer, 2021.
- [29] Woojeong Jin, Meng Qu, Xisen Jin, and Xiang Ren. Recurrent event network: Autoregressive structure inference over temporal knowledge graphs. *arXiv preprint arXiv:1904.05530*, 2019. preprint version.
- [30] Woojeong Jin, Meng Qu, Xisen Jin, and Xiang Ren. Recurrent event network: Autoregressive structure inference over temporal knowledge graphs. In *Proceedings of the 2020 Conference on Empirical Methods in Natural Language Processing (EMNLP)*, pages 6669–6683, 2020.
- [31] Seyed Mehran Kazemi, Rishab Goel, Kshitij Jain, Ivan Kobyzev, Akshay Sethi, Peter Forsyth, and Pascal Poupart. Representation learning for dynamic graphs: A survey. *Journal of Machine Learning Research*, 21(70):1–73, 2020.
- [32] Rage Uday Kiran, Abinash Maharana, and Krishna Reddy Polepalli. A novel explainable link forecasting framework for temporal knowledge graphs using time-relaxed cyclic and acyclic rules. In *Proceedings of the 27th Pacific-Asia Conference on Knowledge Discovery and Data Mining (PAKDD), Part I*, pages 264–275, 2023.
- [33] Srijan Kumar, Xikun Zhang, and Jure Leskovec. Predicting dynamic embedding trajectory in temporal interaction networks. In *Proceedings of the 25th ACM SIGKDD international conference on knowledge discovery & data mining*, pages 1269–1278, 2019.
- [34] Julien Leblay and Melisachew Wudage Chekol. Deriving validity time in knowledge graph. In Pierre-Antoine Champin, Fabien Gandon, Mounia Lalmas, and Panagiotis G. Ipeirotis, editors, *Companion of the The Web Conference 2018 on The Web Conference 2018, WWW 2018, Lyon, France, April 23-27, 2018*, pages 1771–1776. ACM, 2018.
- [35] Kalev Leetaru and Philip A Schrodt. Gdelt: Global data on events, location, and tone, 1979–2012. In *ISA annual convention*, pages 1–49. Citeseer, 2013.
- [36] Ce Li, Rongpei Hong, Xovee Xu, Goce Trajcevski, and Fan Zhou. Simplifying temporal heterogeneous network for continuous-time link prediction. In *Proceedings of the 32nd ACM International Conference on Information and Knowledge Management*, pages 1288–1297, 2023.
- [37] Zixuan Li, Saiping Guan, Xiaolong Jin, Weihua Peng, Yajuan Lyu, Yong Zhu, Long Bai, Wei Li, Jiafeng Guo, and Xueqi Cheng. Complex evolutionary pattern learning for temporal knowledge graph reasoning. In *Proceedings of the 60th Annual Meeting of the Association for Computational Linguistics (ACL), Volume 2: Short Papers*, pages 290–296, 2022.
- [38] Zixuan Li, Xiaolong Jin, Saiping Guan, Wei Li, Jiafeng Guo, Yuanzhuo Wang, and Xueqi Cheng. Search from history and reason for future: Two-stage reasoning on temporal knowledge graphs. In *Proceedings of the 59th Annual Meeting of the Association for Computational Linguistics and the 11th International Joint Conference on Natural Language Processing (ACL/IJCNLP), Volume 1: Long Papers*, pages 4732–4743, 2021.

- [39] Zixuan Li, Xiaolong Jin, Wei Li, Saiping Guan, Jiafeng Guo, Huawei Shen, Yuanzhuo Wang, and Xueqi Cheng. Temporal knowledge graph reasoning based on evolutionary representation learning. In *The 44th International ACM SIGIR Conference on Research and Development in Information Retrieval (SIGIR)*, 2021.
- [40] Zixuan Li, Xiaolong Jin, Wei Li, Saiping Guan, Jiafeng Guo, Huawei Shen, Yuanzhuo Wang, and Xueqi Cheng. Temporal knowledge graph reasoning based on evolutionary representation learning. In *Proceedings of the 44th international ACM SIGIR conference on research and development in information retrieval*, pages 408–417, 2021.
- [41] Qika Lin, Jun Liu, Rui Mao, Fangzhi Xu, and Erik Cambria. TECHS: Temporal logical graph networks for explainable extrapolation reasoning. In *Proceedings of the 61st Annual Meeting of the Association for Computational Linguistics (ACL), Volume 1: Long Papers*, pages 1281–1293, 2023.
- [42] Kangzheng Liu, Feng Zhao, Guandong Xu, Xianzhi Wang, and Hai Jin. RETIA: Relation-entity twin-interact aggregation for temporal knowledge graph extrapolation. In *39th IEEE International Conference on Data Engineering (ICDE)*, pages 1761–1774, 2023.
- [43] Shuwen Liu, Bernardo Grau, Ian Horrocks, and Egor Kostylev. Indigo: Gnn-based inductive knowledge graph completion using pair-wise encoding. *Advances in Neural Information Processing Systems*, 34:2034–2045, 2021.
- [44] Yushan Liu, Yunpu Ma, Marcel Hildebrandt, Mitchell Joblin, and Volker Tresp. TLogic: Temporal logical rules for explainable link forecasting on temporal knowledge graphs. In *36th Conference on Artificial Intelligence (AAAI)*, pages 4120–4127, 2022.
- [45] Yuxuan Liu, Yijun Mo, Zhengyu Chen, and Huiyu Liu. LogE-Net: Logic evolution network for temporal knowledge graph forecasting. In *International Conference on Artificial Neural Networks (ICANN)*, pages 472–485, 2023.
- [46] Erfan Loghmani and MohammadAmin Fazli. Effect of choosing loss function when using t-batching for representation learning on dynamic networks, 2023.
- [47] Yuhong Luo and Pan Li. Neighborhood-aware scalable temporal network representation learning. In *Learning on Graphs Conference*, pages 1–1. PMLR, 2022.
- [48] Farzaneh Mahdisoltani, Joanna Asia Biega, and Fabian M. Suchanek. Yago3: A knowledge base from multilingual wikipedias. In *CIDR*, 2015.
- [49] Xin Mei, Libin Yang, Xiaoyan Cai, and Zuowei Jiang. An adaptive logical rule embedding model for inductive reasoning over temporal knowledge graphs. In *Proceedings of the 2022 Conference on Empirical Methods in Natural Language Processing (EMNLP)*, pages 7304–7316, 2022.
- [50] Alessio Micheli. Neural network for graphs: A contextual constructive approach. *IEEE Transactions on Neural Networks*, 20(3):498–511, 2009.
- [51] Amirhossein Nadiri and Frank W Takes. A large-scale temporal analysis of user lifespan durability on the reddit social media platform. In *Companion Proceedings of the Web Conference 2022*, pages 677–685, 2022.
- [52] Maximilian Nickel, Kevin Murphy, Volker Tresp, and Evgeniy Gabrilovich. A review of relational machine learning for knowledge graphs. *Proceedings of the IEEE*, 104(1):11–33, 2015.
- [53] Ashwin Paranjape, Austin R Benson, and Jure Leskovec. Motifs in temporal networks. In *Proceedings of the tenth ACM international conference on web search and data mining*, pages 601–610, 2017.

- [54] Farimah Poursafaei, Shenyang Huang, Kellin Pelrine, and Reihaneh Rabbany. Towards better evaluation for dynamic link prediction. *Advances in Neural Information Processing Systems*, 35:32928–32941, 2022.
- [55] Ladislav Rampásek, Michael Galkin, Vijay Prakash Dwivedi, Anh Tuan Luu, Guy Wolf, and Dominique Beaini. Recipe for a general, powerful, scalable graph transformer. *Advances in Neural Information Processing Systems*, 35:14501–14515, 2022.
- [56] Jakub Reha, Giulio Lovisotto, Michele Russo, Alessio Gravina, and Claas Grohnfeldt. Anomaly detection in continuous-time temporal provenance graphs. In *Temporal Graph Learning Workshop@ NeurIPS 2023*, 2023.
- [57] Andrea Rossi, Denilson Barbosa, Donatella Firmani, Antonio Matinata, and Paolo Merialdo. Knowledge graph embedding for link prediction: A comparative analysis. *ACM Transactions on Knowledge Discovery from Data (TKDD)*, 15(2):1–49, 2021.
- [58] Emanuele Rossi, Ben Chamberlain, Fabrizio Frasca, Davide Eynard, Federico Monti, and Michael Bronstein. Temporal graph networks for deep learning on dynamic graphs. *arXiv preprint arXiv:2006.10637*, 2020.
- [59] Grace I. Scarborough, Benjamin E. Bagozzi, Andreas Beger, John Berrie, Andrew Halterman, Philip A. Schrod, and Jevon Spivey. POLECAT Weekly Data, 2023.
- [60] Franco Scarselli, Marco Gori, Ah Chung Tsoi, Markus Hagenbuchner, and Gabriele Monfardini. The graph neural network model. *IEEE Transactions on Neural Networks*, 20(1):61–80, 2009.
- [61] Oleksandr Shchur, Maximilian Mumme, Aleksandar Bojchevski, and Stephan Günnemann. Pitfalls of graph neural network evaluation. *Workshop on Relational Representation Learning, 32nd Conference on Neural Information Processing Systems (NeurIPS)*, 2018.
- [62] Andrew Shilliday, Jennifer Lautenschlager, et al. Data for a worldwide icews and ongoing research. *Advances in Design for Cross-Cultural Activities*, 455, 2012.
- [63] Haohai Sun, Jialun Zhong, Yunpu Ma, Zhen Han, and Kun He. Timetraveler: Reinforcement learning for temporal knowledge graph forecasting. In *Proceedings of the 2021 Conference on Empirical Methods in Natural Language Processing (EMNLP)*, pages 8306–8319, 2021.
- [64] Zhiqing Sun, Shikhar Vashishth, Soumya Sanyal, Partha P. Talukdar, and Yiming Yang. A re-evaluation of knowledge graph completion methods. In *Proceedings of the 58th Annual Meeting of the Association for Computational Linguistics (ACL)*, pages 5516–5522, 2020.
- [65] Denny Vrandečić and Markus Krötzsch. Wikidata: a free collaborative knowledgebase. *Communications of the ACM*, 57(10):78–85, 2014.
- [66] Shiwen Wu, Fei Sun, Wentao Zhang, Xu Xie, and Bin Cui. Graph neural networks in recommender systems: a survey. *ACM Computing Surveys*, 55(5):1–37, 2022.
- [67] Yi Xu, Junjie Ou, Hui Xu, and Luoyi Fu. Temporal knowledge graph reasoning with historical contrastive learning. In *37th Conference on Artificial Intelligence (AAAI)*, pages 4765–4773, 2023.
- [68] Hansheng Xue, Luwei Yang, Wen Jiang, Yi Wei, Yi Hu, and Yu Lin. Modeling dynamic heterogeneous network for link prediction using hierarchical attention with temporal rnn. In *Machine Learning and Knowledge Discovery in Databases: European Conference, ECML PKDD 2020, Ghent, Belgium, September 14–18, 2020, Proceedings, Part I*, pages 282–298. Springer, 2021.
- [69] Ying Yin, Li-Xin Ji, Jian-Peng Zhang, and Yu-Long Pei. Dhne: Network representation learning method for dynamic heterogeneous networks. *IEEE Access*, 7:134782–134792, 2019.

- [70] Chongjian Yue, Lun Du, Qiang Fu, Wendong Bi, Hengyu Liu, Yu Gu, and Di Yao. Htgn-btw: Heterogeneous temporal graph network with bi-time-window training strategy for temporal link prediction. *arXiv preprint arXiv:2202.12713*, 2022.
- [71] Mengqi Zhang, Yuwei Xia, Qiang Liu, Shu Wu, and Liang Wang. Learning latent relations for temporal knowledge graph reasoning. In *Proceedings of the 61st Annual Meeting of the Association for Computational Linguistics (ACL), Volume 1: Long Papers*, pages 12617–12631, 2023.
- [72] Cunchao Zhu, Muhao Chen, Changjun Fan, Guangquan Cheng, and Yan Zhang. Learning from history: Modeling temporal knowledge graphs with sequential copy-generation networks. In *35th Conference on Artificial Intelligence (AAAI)*, pages 4732–4740, 2021.

## Checklist

1. For all authors...
  - (a) Do the main claims made in the abstract and introduction accurately reflect the paper’s contributions and scope? [\[Yes\]](#)
  - (b) Did you describe the limitations of your work? [\[Yes\]](#) We discuss Limitations in Appendix B.
  - (c) Did you discuss any potential negative societal impacts of your work? [\[Yes\]](#) We discuss potential negative impacts in Appendix C.
  - (d) Have you read the ethics review guidelines and ensured that your paper conforms to them? [\[Yes\]](#) The authors have carefully reviewed the guidelines and made their best to comply with that.
2. If you are including theoretical results...
  - (a) Did you state the full set of assumptions of all theoretical results? [\[N/A\]](#) We do not include any theoretical results.
  - (b) Did you include complete proofs of all theoretical results? [\[N/A\]](#) We do not include any theoretical results.
3. If you ran experiments (e.g. for benchmarks)...
  - (a) Did you include the code, data, and instructions needed to reproduce the main experimental results (either in the supplemental material or as a URL)? [\[Yes\]](#) We include a link to a GitHub repository with code to reproduce the experimental results in Section 1, along with the link to TGB 2.0 website with additional instructions and documentations. Please check Section 5 for experiment description and results, Section 4 for dataset description, and Appendix G for more experimental details.
  - (b) Did you specify all the training details (e.g., data splits, hyperparameters, how they were chosen)? [\[Yes\]](#) All of these details can be found in Section 5, Appendix G, and Appendix G.3.1 for the hyperparameters.
  - (c) Did you report error bars (e.g., with respect to the random seed after running experiments multiple times)? [\[Yes\]](#) We report the average performance and the standard deviation across 5 runs for all non-deterministic methods. Please find the results in Section 5.
  - (d) Did you include the total amount of compute and the type of resources used (e.g., type of GPUs, internal cluster, or cloud provider)? [\[Yes\]](#) Details are in Appendix G.1.
4. If you are using existing assets (e.g., code, data, models) or curating/releasing new assets...
  - (a) If your work uses existing assets, did you cite the creators? [\[Yes\]](#) The original reserach are cited in Section 4 and the links to datasets are presented in Appendix D.
  - (b) Did you mention the license of the assets? [\[Yes\]](#) We discuss the dataset licenses in Appendix D.



- 605 (c) Did you include any new assets either in the supplemental material or as a URL? [\[Yes\]](#)  
606 The dataset download links can be found in Appendix D.
- 607 (d) Did you discuss whether and how consent was obtained from people whose data you're  
608 using/curating? [\[Yes\]](#) We provide information on dataset sources in Appendix D.
- 609 (e) Did you discuss whether the data you are using/curating contains personally identifiable  
610 information or offensive content? [\[Yes\]](#) We have anonymized the dataset where  
611 necessary to eliminate any personally identifiable information.
- 612 5. If you used crowdsourcing or conducted research with human subjects...
- 613 (a) Did you include the full text of instructions given to participants and screenshots, if  
614 applicable? [\[N/A\]](#) We have not used crowdsourcing or conducted research with human  
615 subjects.
- 616 (b) Did you describe any potential participant risks, with links to Institutional Review  
617 Board (IRB) approvals, if applicable? [\[N/A\]](#) We have not used crowdsourcing or  
618 conducted research with human subjects.
- 619 (c) Did you include the estimated hourly wage paid to participants and the total amount  
620 spent on participant compensation? [\[N/A\]](#) We have not used crowdsourcing or con-  
621 ducted research with human subjects.

## A Dataset Checklist

1. Submission introducing new datasets must include the following in the supplementary materials
  - (a) Dataset documentation and intended uses. [Yes] We include the datasheets for datasets of TGB 2.0 in Appendix I.
  - (b) URL to website/platform where the dataset/benchmark can be viewed and downloaded by the reviewers. [Yes] The website link and documentation link is included in Appendix D.
  - (c) URL to Croissant metadata record documenting the dataset/benchmark available for viewing and downloading by the reviewers. [Yes] The croissant metadata record link is [https://object-arbutus.cloud.computecanada.ca/tgb/tgb2\\_croissant.json](https://object-arbutus.cloud.computecanada.ca/tgb/tgb2_croissant.json).
  - (d) Author statement that they bear all responsibility in case of violation of rights, etc., and confirmation of the data license. [Yes] Yes, we bear all responsibility and also state this in Appendix E.
  - (e) Hosting, licensing, and maintenance plan. [Yes] Yes, we discuss the hosting and licensing plan in Appendix D.
2. To ensure accessibility, the supplementary materials for datasets must include the following:
  - (a) Links to access the dataset and its metadata. [Yes] Yes, all links are provided in Appendix E and D.
  - (b) The dataset itself should ideally use an open and widely used data format. Provide a detailed explanation on how the dataset can be read. For simulation environments, use existing frameworks or explain how they can be used. [Yes] The dataset is automatically downloaded and processed by the TGB 2.0 code and presented in ML ready format.
  - (c) Long-term preservation: It must be clear that the dataset will be available for a long time, either by uploading to a data repository or by explaining how the authors themselves will ensure this. [Yes] TGB 2.0 datasets are maintained via Digital Research Alliance of Canada (funded by the Government of Canada).
  - (d) Explicit license: Authors must choose a license, ideally a CC license for datasets, or an open source license for code (e.g. RL environments). [Yes] Yes, all dataset licenses are provided in Appendix E. The TGB 2.0 code is provided in the MIT license.
  - (e) Add structured metadata to a dataset's meta-data page using Web standards (like schema.org and DCAT): This allows it to be discovered and organized by anyone. If you use an existing data repository, this is often done automatically. [Yes] We provide the croissant metadata record, the link is [https://object-arbutus.cloud.computecanada.ca/tgb/tgb2\\_croissant.json](https://object-arbutus.cloud.computecanada.ca/tgb/tgb2_croissant.json).
  - (f) Highly recommended: a persistent dereferenceable identifier (e.g. a DOI minted by a data repository or a prefix on identifiers.org) for datasets, or a code repository (e.g. GitHub, GitLab,...) for code. If this is not possible or useful, please explain why. [Yes] The DOI for the project is <https://zenodo.org/doi/10.5281/zenodo.11480521>.

## B Limitations

This work exclusively considers the continuous-time setting for THG datasets. Depending on the application, either the continuous-time or discrete-time setting may be more appropriate. However, the continuous-time setting is often regarded as the more general framework. Nonetheless, many THG methods are designed for discrete settings. Thus, as future work, discretized versions of the datasets for comparative analysis between discrete methods could be added.

Additionally, the TGB 2.0 dataset collection currently includes datasets from only five distinct domains. Notably, domains such as biological networks and citation networks are not represented. To

671 address this limitation, we plan to expand the dataset collection by incorporating additional datasets  
672 based on community feedback, thereby enhancing the diversity and comprehensiveness of the dataset  
673 repository.

## 674 C Broader Impact

675 **Impact on Temporal Graph Learning.** Recently, the availability of large graph benchmarks  
676 accelerates research in the field [25, 24, 10]. By providing a standardized benchmarking framework,  
677 TGB 2.0 will accelerate the development and evaluation of new models for temporal knowledge  
678 graphs and temporal heterogeneous graphs. Researchers can build upon a common foundation,  
679 leading to more rapid and robust advancements in this field. In addition, the introduction of a unified  
680 evaluation framework addresses reproducibility issues, which are critical for scientific progress. The  
681 comprehensive evaluation facilitated by TGB 2.0 ensures that new methods are rigorously tested  
682 against state-of-the-art baselines, leading to more robust and well-validated models. This contributes  
683 to higher standards in research and more reliable outcomes. Overall, this work has the potential  
684 to significantly impact both the academic research community and practical applications, driving  
685 forward the understanding and utilization of multi-relational temporal graphs in various fields.

686 **Potential Negative Impact.** The TGB 2.0 datasets may limit the utilization and mining of other  
687 TG datasets. If the datasets are not representative of the broader set of real-world data, this could  
688 lead to biased or unfair outcomes when models are applied in practice. Similarly, the community  
689 might become overly dependent on the TGB 2.0 framework, potentially hindering the exploration  
690 of alternative benchmarking methodologies or the development of diverse evaluation protocols that  
691 might be more suitable for specific contexts or emerging subfields. Moreover, when the focus is  
692 mainly on quantitative performance metrics, it might overshadow the importance of qualitative  
693 assessments and other critical factors such as interpretability, fairness, and ethical considerations  
694 in model development and deployment. To avoid this issue, we plan to update TGB regularly with  
695 community feedback as well as adding additional datasets and tasks.

## 696 D Dataset Documentation and Intended Use

697 All datasets presented by TGB 2.0 are intended for academic use and their corresponding licenses  
698 are listed in Appendix E. We also anonymized the datasets, to remove any personally identifiable  
699 information where appropriate. For the ease of access, we provide the following links to the TGB 2.0  
700 benchmark suits and datasets.

- 701 • The code is available publicly on TGB2 Github: <https://github.com/JuliaGast/TGB2>. The  
702 code will also be merged into TGB Github.
- 703 • Dataset and project documentations can be found at: <https://tgb.complexdatalab.com/>.
- 704 • Tutorials and API references can be found at: <https://docs.tgb.complexdatalab.com/>.
- 705 • Hugging face link for main dataset files is [https://huggingface.co/datasets/](https://huggingface.co/datasets/andrewsleader/TGB/tree/main)  
706 [andrewsleader/TGB/tree/main](https://huggingface.co/datasets/andrewsleader/TGB/tree/main).
- 707 • ML croissant metadata file link is [https://object-arbutus.cloud.computecanada.ca/](https://object-arbutus.cloud.computecanada.ca/tgb/tgb2_croissant.json)  
708 [tgb/tgb2\\_croissant.json](https://object-arbutus.cloud.computecanada.ca/tgb/tgb2_croissant.json).

709 **Maintenance Plan.** We plan to continue to improve and develop TGB 2.0 based on community  
710 feedback to provide a reproducible, open and robust benchmark for temporal multi-relational graphs.  
711 We will maintain and improve the TGB 2.0, TGB and TGB-Baselines github repository, while the  
712 TGB 2.0 datasets are maintained via Digital Research Alliance of Canada (funded by the Government  
713 of Canada).

## E Dataset Licenses and Download Links

In this section, we present dataset licenses and the download link (embedded in dataset name). The datasets are maintained via Digital Research Alliance of Canada funded by the Government of Canada. As authors, we confirm the data licenses as indicated below and that we bear all responsibility in case of violation of rights. We also included the metadata for datasets in the ML croissant format [2]. The ML croissant metadata link is [https://object-arbutus.cloud.computecanada.ca/tgb/tgb2\\_croissant.json](https://object-arbutus.cloud.computecanada.ca/tgb/tgb2_croissant.json).

- **tkgl-smallpedia:** Wikidata License. See license information from Wikidata License Page. Property and lexeme namespaces is made available under the Creative Commons CC0 License. Text in other namespaces is made available under the Creative Commons Attribution-ShareAlike License. Here is the data source link.
- **tkgl-polecat:** [CC0 1.0 DEED license](#). Here is the data source link.
- **tkgl-icews:** Custom Dataset License. The detailed license information can be found here. Restrictions on use: these materials are subject to copyright protection and may only be used and copied for research and educational purposes. The materials may not be used or copied for any commercial purposes. Here is the data source link.
- **tkgl-wikidata:** [Wikidata License](#). See license information from Wikidata License Page. Property and lexeme namespaces is made available under the Creative Commons CC0 License. Text in other namespaces is made available under the Creative Commons Attribution-ShareAlike License. Here is the data source link.
- **thgl-software:** [CC-BY-4.0 license](#). This dataset is curated from GH Arxiv code which has the MIT License. Content based on [www.gharchive.org](http://www.gharchive.org) is released under the CC-BY-4.0 license. To avoid any personal identifiable information, we anonymized all nodes to integers. The raw data can be found here.
- **thgl-forum:** [CC BY-NC 2.0 DEED license](#). The raw data source is here [51].
- **thgl-myket:** [CC BY-NC 4.0 DEED license](#). A smaller subset of this dataset is available on Github.
- **thgl-github:** [CC-BY-4.0 license](#). This dataset is curated from GH Arxiv code which has the MIT License. Content based on [www.gharchive.org](http://www.gharchive.org) is released under the CC-BY-4.0 license. To avoid any personal identifiable information, we anonymized all nodes to integers. The raw data can be found here.

## F Dataset Statistics

Figure 5 shows how the number of edges change over time for TKG datasets. Figure 6 shows how the number of edges change over time for THG datasets. While most datasets exhibit fluctuations in the number of edges around a constant level, **tkgl-wikidata** stands out with a significant upward trend in the number of edges over the years, indicating a surge in events, particularly in recent years. In addition, noteworthy deviations in timesteps are apparent. TKG datasets display anomalous timesteps characterized by minimal edge numbers, particularly evident during the Covid pandemic for **tkgl-icews**. Conversely, for the THG datasets the occurrence of zero-edge timesteps is not indicative of outliers; rather, it reflects the continuous nature of the data, where not every second entails an event occurrence. THG datasets exhibit instances of exceptionally high edge counts per timestep, such as in the case of **thgl-forum** with up to 120 edges per timestamp.

Figure 7 shows the top ten most frequent edge types in TKG datasets. Figure 8 shows the top ten most frequent edge types in THG datasets. Note that TKG datasets in general has more edge types than THG datasets. Most common THG relations usually share similar portion of edges in the dataset while TKG relations shares different portion of edges.

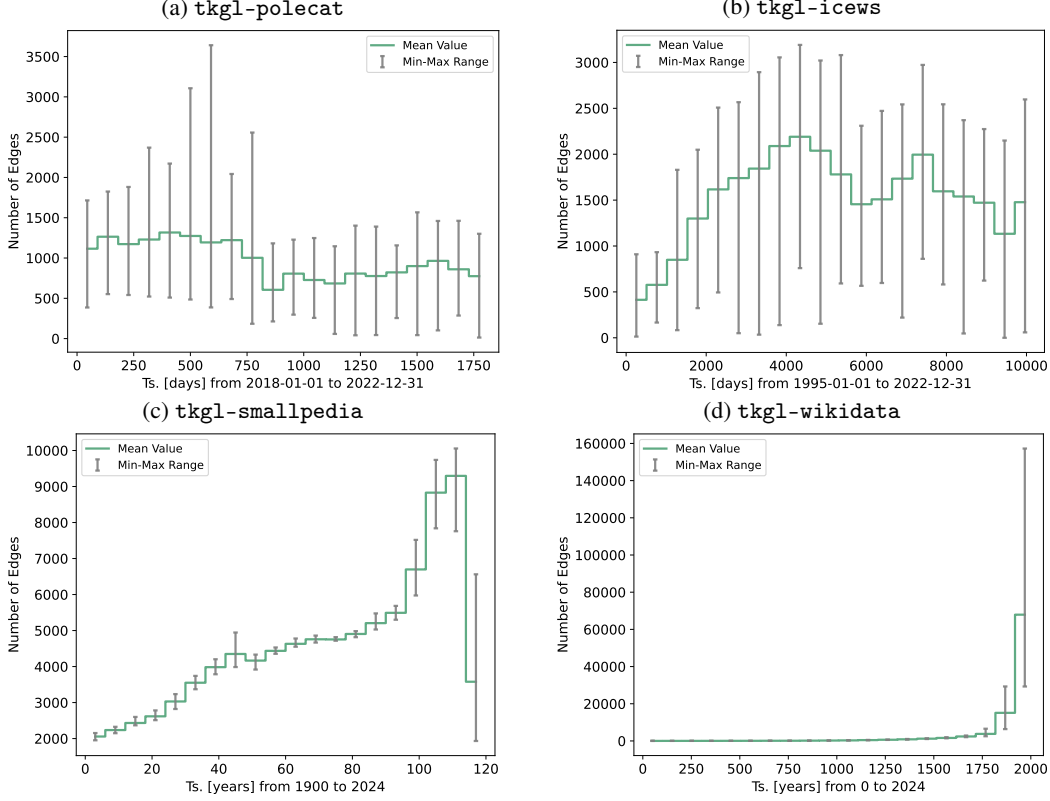

Figure 5: Dataset Edges over time for TKG.

## G Experimental Details

In the following, we provide additional experimental details such as the computing resources, resource consumption, hyperparameters, and runtime statistics.

### G.1 Computing Resources

We ran all experiments on either Narval or Béluga cluster of Digital Research Alliance of Canada or the Mila, Québec AI Institute cluster. For the experiments on the Narval cluster, we ran each experiment on a Nvidia A100 (40G memory) GPU with 4 CPU nodes (from either of the AMD Rome 7532 @ 2.40 GHz 256M cache L3, AMD Rome 7502 @ 2.50 GHz 128M cache L3, or AMD Milan 7413 @ 2.65 GHz 128M cache L3 available type) each with 100GB memory. For experiments on the Béluga cluster, we ran each experiments on a NVidia V100SXM2 (16G memory) GPU wiht 4 CPU nodes (from Intel Gold 6148 Skylake @ 2.4 GHz) each with 100GB memory. For the experiments on the Mila cluster, we ran each experiment on an RTX8000 (40G memory) GPU or an V100 (32G memory) GPU with 4 CPU nodes (from either of the AMD Rome 7532 @ 2.40 GHz 256M cache L3, AMD Rome 7502 @ 2.50 GHz 128M cache L3, or AMD Milan 7413 @ 2.65 GHz 128M cache L3 available type). The upper limit of RAM was set to 1056GB.

A seven-day time limit was considered for each experiment. For all non deterministic methods, i.e. all methods besides Edgebank and the Recurrency Baseline, we repeated each experiments five times and reported the average and standard deviation of different runs. It is noteworthy that except for the reported baseline results, the other models, all evaluated by their original source code, throw an out of memory error or do not finish in the given time limit for the medium and large datasets on all available resources including Narval, Béluga, and Mila clusters.

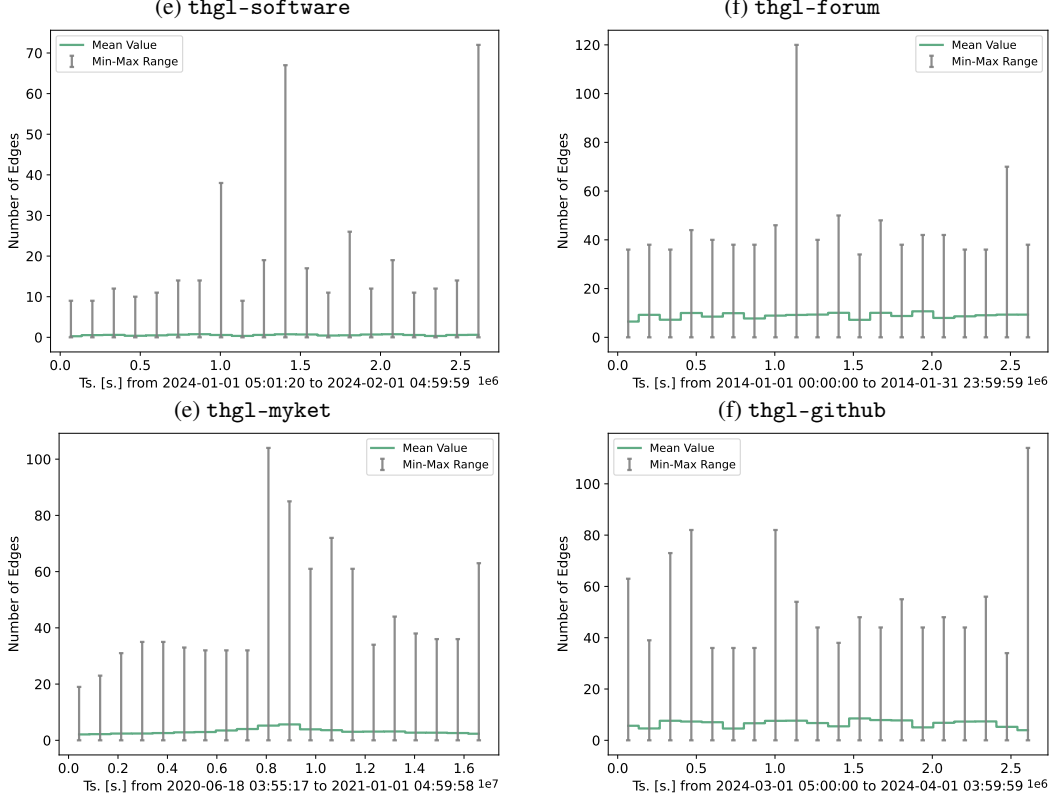

Figure 6: Dataset Edges over time for THG.

Table 4: GPU memory usage in **GB** for the *Temporal Knowledge Graph Link Prediction* task for the methods that run on GPU. We report the average across 5 runs.

| Method      | tkgl-smallpedia | tkgl-polecat | tkgl-icews | tkgl-wikidata |
|-------------|-----------------|--------------|------------|---------------|
| RE-GCN [39] | 20.9            | 21.2         | 24.3       | OOM           |
| CEN [37]    | 28.8            | 41.0         | 31.6       | OOM           |

## 781 G.2 GPU Usage Comparison

782 In Table 4 and 5, we report the average GPU usage of TKG and THG methods on the dataset across 5  
783 trials. Note that the Recurrency Baseline, EdgeBank, and TLogic only require CPU thus no GPU  
784 usage is reported. For TKG, some methods such as CEN on tkgl-polecat have higher GPU usage  
785 when compared to others. For THG, scalability is a significant issue, as most methods involve high  
786 GPU usage and often result in out-of-memory errors, especially with larger datasets. Although STHN  
787 maintains manageable GPU usage, it requires substantial RAM to compute the subgraphs, making it  
788 impractical for use in all environments.

## 789 G.3 Runtime Comparison

790 In Table 6 and Table 7 we report the inference times as well as the total time for training, validation  
791 and testing for each method for TKG and THG experiments. For the non-deterministic methods, we  
792 report the average across 5 runs. The tables illustrate that both, inference times, as well as total times  
793 vary significantly across methods.

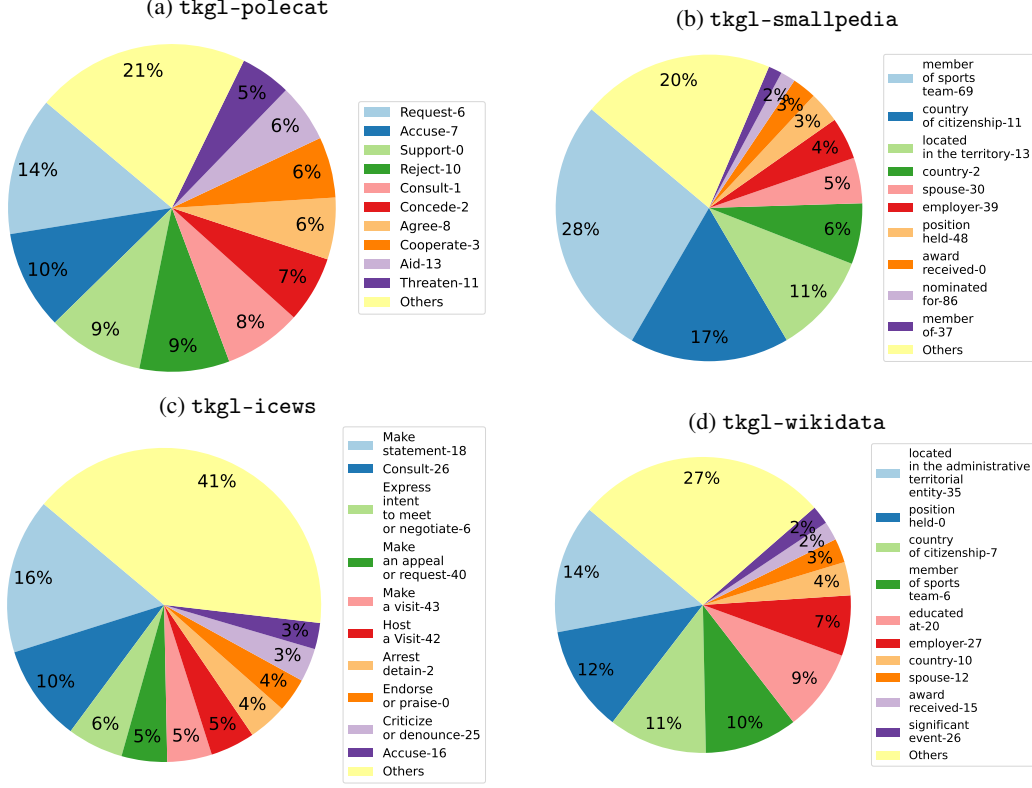

Figure 7: Edge type ratios in TGB 2.0 TKGs. We include the 10 most frequent edge types.

Table 5: GPU memory usage in **GB** for *Temporal Heterogeneous Graph Link Prediction* task. We report the average across 5 runs.

| Method                   | thgl-software | thgl-forum | thgl-myket | thgl-github |
|--------------------------|---------------|------------|------------|-------------|
| TGN [58]                 | 7             | 8          | -          | -           |
| TGN <sub>edge-type</sub> | 10            | 12         | -          | -           |
| STHN [36]                | 15            | -          | -          | -           |

### G.3.1 Hyperparameters

If not stated otherwise, for each method we use the hyperparameter setting as reported in the original papers, please see Table 8. Whereas further hyperparameter tuning could further improve performance of each method, it was out of scope for this work. We only change the hyperparameter values only if the methods would not finish with the given time or memory limit. In this case, we follow recommendations from [14] (to decrease rule length and window size for TLogic), from the authors of [13] (to decrease the window length for the Recurrency Baseline), and from the authors of [39] (to decrease the history length for RE-GCN and CEN).

### G.4 Experimental Observations

Several methods encountered memory limitations or did not complete within the designated time constraints. Thus, as described in Section 5, their performance is not reported. In the following, we provide additional details on the problems of individual methods:

- RE-GCN and CEN run out of GPU memory for tkgl-wikidata, even if severely limiting embedding dimension and history length.



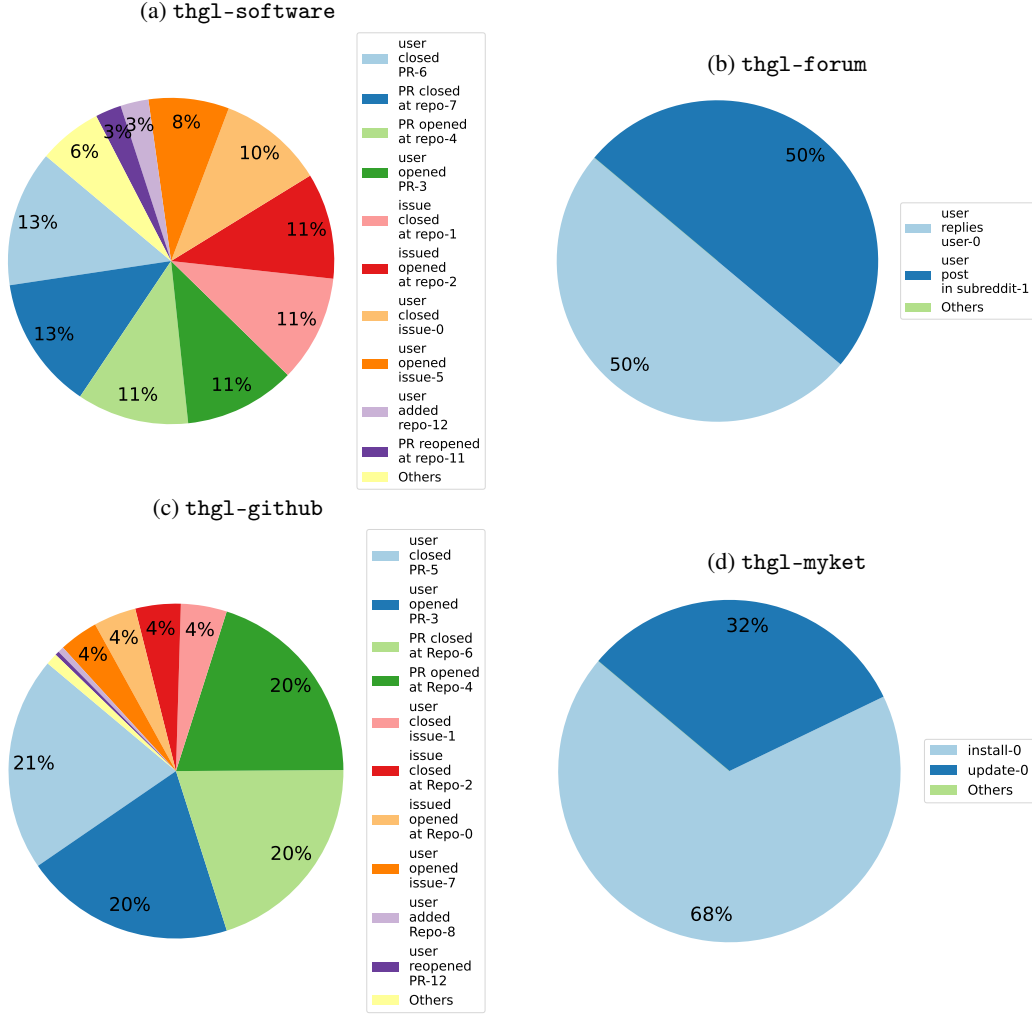

Figure 8: Edge type ration in TGB 2.0 THGs.

Table 6: Inference time as well as total train and validation times for *Temporal Knowledge Graph Link Prediction* task in **seconds**. For non-deterministic methods, we report the average across 5 different runs.

| Method                                     | tkgl-smallpedia |        | tkgl-polecat |         | tkgl-icews |         | tkgl-wikidata |       |
|--------------------------------------------|-----------------|--------|--------------|---------|------------|---------|---------------|-------|
|                                            | Test            | Total  | Test         | Total   | Test       | Total   | Test          | Total |
| EdgeBank <sub>tw</sub> [54]                | 2,935           | 5,810  | 46,629       | 94,475  | 311,278    | 600,929 | 5,445         | 8,875 |
| EdgeBank <sub>∞</sub> [54]                 | 4,417           | 8,259  | 31,713       | 64,157  | 203,268    | 412,774 | 4,814         | 7,923 |
| RecurrencyBaseline <sub>train</sub> [13]   | 310             | 9,895  | 4,500        | 8,343   | -          | -       | -             | -     |
| RecurrencyBaseline <sub>default</sub> [13] | 316             | 659    | 3,392        | 80,378  | 11,756     | 30,110  | -             | -     |
| RE-GCN [39]                                | 165             | 3,895  | 1,766        | 45,877  | 6,848      | 114,370 | -             | -     |
| CEN [37]                                   | 331             | 14,493 | 2,726        | 77,953  | 8,999      | 202,477 | -             | -     |
| TLogic [44]                                | 331             | 803    | 75,654       | 138,636 | 60,413     | 128,391 | -             | -     |

- Recurrency Baseline does not finish in the designated time constraint for the large THG datasets thgl-myket and thgl-github and the large TKG dataset tkgl-wikidata.
- TLogic does not finish in the designated time constraint for tkgl-wikidata. Further, we reduced the rule length to 1 to fit in the time constraint and memory limitations for the introduced datasets.

Table 7: Inference time as well as total train and validation time for *Temporal Heterogeneous Graph Link Prediction* task in **seconds**. For the non-deterministic methods, we report the average across 5 different runs.

| Method                                     | thgl-software |         | thgl-forum |         | thgl-myket |        | thgl-github |       |
|--------------------------------------------|---------------|---------|------------|---------|------------|--------|-------------|-------|
|                                            | Test          | Total   | Test       | Total   | Test       | Total  | Test        | Total |
| EdgeBank <sub>tw</sub> [54]                | 102           | 203     | 1,158      | 2,329   | 4,820      | 9,603  | 295         | 301   |
| EdgeBank <sub>∞</sub> [54]                 | 107           | 212     | 1,148      | 2,303   | 4,956      | 10,017 | 282         | 296   |
| RecurrencyBaseline <sub>default</sub> [13] | 62,259        | 114,124 | 32,539     | 65,114  | -          | -      | -           | -     |
| TGN [58]                                   | 686           | 66,290  | 7,654      | 8,8659  | -          | -      | -           | -     |
| TGN <sub>edge-type</sub>                   | 567           | 39,427  | 8,241      | 111,494 | -          | -      | -           | -     |
| STHN [36]                                  | 52,101        | 102,943 | -          | -       | -          | -      | -           | -     |

Table 8: Hyperparameter choices. Values that are different from the original papers are **bolded**. In case we modify the values for different datasets, we report so in the respective columns.

| Method                   | Hyperparameter Values                                                                                                                                                                    |                          |
|--------------------------|------------------------------------------------------------------------------------------------------------------------------------------------------------------------------------------|--------------------------|
|                          | All Datasets                                                                                                                                                                             | Dataset-specific         |
| TLogic                   | <b>rule_lengths = 1</b> , window = 0, top_k = 20                                                                                                                                         | tkgl-icews: window = 500 |
| RE-GCN                   | n_hidden = 200, n_layers = 2, dropout = 0.2, lr = 0.001, n_bases = 100, train_history_len = 3, test_history_len = 3                                                                      |                          |
| CEN                      | n_hidden = 200, n_layers = 2, dropout = 0.2, lr = 0.001, n_bases = 100, n_layers = 2, <b>train_history_len = 3</b> , test_history_len = 3, <b>start_history_len = 2</b> , dilate_len = 1 |                          |
| RecB                     | $\lambda = 0.1$ , $\alpha = 0.99$ , window = 0                                                                                                                                           | tkgl-icews: window = 500 |
| Method                   | Hyperparameter Values                                                                                                                                                                    |                          |
|                          | All Datasets                                                                                                                                                                             | Dataset-specific         |
| RecB                     | $\lambda = 0.1$ , $\alpha = 0.99$ , window = 0                                                                                                                                           |                          |
| TGN                      | lr = $1e-04$ , mem_dim = 100, time_dim = 100, emb_dim = 100, num_neighbors = 10                                                                                                          |                          |
| TGN <sub>edge-type</sub> | lr = $1e-04$ , mem_dim = 100, time_dim = 100, emb_dim = 100, num_neighbors = 10, edge_emb_dim = 16                                                                                       |                          |
| STHN                     | lr = $5e-04$ , max_edges = 50, window_size = 5, dropout = 0.1, time_dims = 100, hidden_dims = 100                                                                                        |                          |

813 • STHN model has very high memory consumption, requires 185 GB of RAM on the small  
814 thgl-software dataset (mostly due to subgraph computations). On the rest of THG  
815 datasets, it runs out of memory.

816 • TGN and TGN<sub>edge-type</sub> run out of GPU memory for both thgl-myket and thgl-github,  
817 even if limiting embedding dimension to time\_dim = mem\_dim = emb\_dim = 16 and  
818 edgeType\_dim = 16.

## 819 G.5 Ablation Study on Negative Sample Generation

820 Here, we compare results for evaluation on the full set of nodes (*1-vs-all*) versus a limited number  
821 of negative samples *q* (*1-vs-q*). We also compare our sampling method based on destination nodes  
822 of each edge type (*1-vs-q* (ours)) with that of random sampling (*1-vs-q* (random)). We select the  
823 tkgl-smallpedia dataset and report results for the Recurrency Baseline as well as Edgebank,  
824 as both methods perform competitively while being deterministic. Table 9 confirms expectations:  
825 random negative sampling yields the highest MRR values. MRR values for our destination-aware neg-  
826 ative sampling demonstrate a closer proximity to the full sampling (*1-vs-all*) for both methodologies.  
827 Notably, employing the 1-vs-all approach yields the lowest MRR for both test and validation sets,  
828 underscoring the importance of comprehensive evaluations whenever feasible. However, particularly  
829 evident in the case of Edgebank, the adoption of negative sampling significantly reduces test time,  
830 changing from approximately 3000 seconds to 70 seconds.

Table 9: MRR and Runtime for Edgebank and the Recurrency Baseline (RecB) on the tkg1-smallpedia dataset for three different strategies for Negative Sample Generation.

| Strategy              | Method                       | MRR   |       | Runtime [s.] |       |
|-----------------------|------------------------------|-------|-------|--------------|-------|
|                       |                              | valid | test  | test         | total |
| 1-vs-1000<br>(random) | RecB <sub>default</sub> [13] | 0.755 | 0.734 | 278          | 692   |
|                       | EdgeBank <sub>tw</sub> [54]  | 0.706 | 0.576 | 72           | 141   |
| 1-vs-1000<br>(ours)   | RecB <sub>default</sub> [13] | 0.642 | 0.608 | 282          | 703   |
|                       | EdgeBank <sub>tw</sub> [54]  | 0.612 | 0.495 | 104          | 210   |
| 1-vs-all              | RecB <sub>default</sub> [13] | 0.640 | 0.570 | 316          | 659   |
|                       | EdgeBank <sub>tw</sub> [54]  | 0.457 | 0.353 | 2935         | 5810  |

Table 10: Number of Edges and timestamps for train, validation and test set for each dataset in TGB 2.0.

| Dataset            | Temporal Knowledge Graphs (tkg1-) |           |            |           | Temporal Heterogeneous Graphs (thg1-) |            |            |            |
|--------------------|-----------------------------------|-----------|------------|-----------|---------------------------------------|------------|------------|------------|
|                    | smallpedia                        | polecat   | icews      | wikidata  | software                              | forum      | github     | myket      |
| # Train Quadruples | 387,757                           | 1,246,556 | 10,861,600 | 6,982,503 | 1,042,866                             | 16,630,396 | 12,249,711 | 37,542,951 |
| # Valid Quadruples | 81,033                            | 266,736   | 2,326,157  | 1,434,950 | 223,469                               | 3,563,658  | 2,624,934  | 8,044,922  |
| # Test Quadruples  | 81,586                            | 266,318   | 2,325,689  | 1,438,750 | 223,471                               | 3,563,653  | 2,624,932  | 804,4915   |
| # All Quadruples   | 550,376                           | 1,779,610 | 15,513,446 | 9,856,203 | 1,489,806                             | 23,757,707 | 17,499,577 | 53,632,788 |
| # Train Timesteps  | 98                                | 1,193     | 7,187      | 1,999     | 485,863                               | 1,805,376  | 1,703,696  | 9,935,183  |
| # Valid Timesteps  | 10                                | 329       | 1,341      | 12        | 99,500                                | 393,000    | 382,882    | 2,274,936  |
| # Test Timesteps   | 17                                | 304       | 1,696      | 14        | 104,186                               | 360,081    | 423,837    | 2,617,971  |
| # All Timesteps    | 125                               | 1,826     | 10,224     | 2,025     | 689,549                               | 2,558,457  | 2,510,415  | 14,828,090 |

## G.6 Detailed information on Train, Validation, and Test Splits

As described in Section 4, we split all datasets chronologically into the training, validation, and test sets, respectively containing 70%, 15%, and 15% of all edges. Because we ensure that edges for a timesteps can only be in either train or validation or test set, and because the number of edges over time are not constant, the cuts are not strict. We provide more details on the exact splits in Table 10.

## H More Details on Methods

In the following we will describe the methods that we selected for our experiments.

### H.1 Temporal Knowledge Graph Forecasting

For our experiments we select methods from a variety of methods from the previous literature. We base our selection on a) code availability, b) comparatively high performance in previous studies on smaller datasets (following results as reported in [14] and [13], i.e. we exclude methods that are reported to have lower MRRs on all previous datasets as compared to the Recurrency Baseline), and c) we exclude methods that have reported to have long runtimes or high GPU memory consumption on the existing smaller datasets (e.g. [20] for the GDELT dataset [14]). This results in the following TKG baselines:

- *RE-GCN* [39] learns from the sequence of Knowledge Graph snapshots recurrently by combining a convolutional graph Neural Network with a sequential Neural Network model. It also incorporates a static graph constraint to include additional information like entity types.
- *CEN* [37] integrates a GCN capable of handling evolutionary patterns of different lengths through a learning strategy that progresses from short to long patterns. This model can adapt to changes in evolutionary patterns over time in an online setting, being updated with historical facts during testing.

- *TLogic* [44] is a symbolic framework that learns temporal logic rules via temporal random walks, traversing edges backward in time through the graph. It applies these rules to events preceding the query, considering both the confidence of the rules and the time differences for scoring answer candidates.
- Recurrency Baseline [13] is a baseline method that predicts recurring facts by combining scores based on strict recurrency, considering the recency and frequency of these facts, and scores based on relaxed recurrency, which accounts for the recurrence of parts of the query. Two versions of this baseline are tested:  $\text{RecB}_{\text{default}}$ , which uses default parameter values, and  $\text{RecB}_{\text{train}}$ , which selects parameter values based on a grid search considering performance on the validation set.

## H.2 Temporal Heterogeneous Graph Forecasting

- *TGN* [58] represents a comprehensive framework designed for learning on dynamic graphs in continuous time. Its components include a memory module, message function, message aggregator, memory updater, and embedding module. During testing, TGN updates the memories of nodes with edges that have been newly observed. Additionally, to incorporate edge types into the TGN, we devised a variant of the TGN capable of utilizing edge type information. This was achieved by generating embeddings from the edge types, which were then concatenated with the original messages within the TGN model.
- *STHN* [36] designed for continuous-time link prediction on Temporal heterogeneous networks that efficiently manages dynamic interactions. The architecture consists of a *Heterogeneous Link Encoder* with type and time encoding components, which embed historical interactions to produce a temporal link representation. The process continues with *Semantic Patches Fusion*, where sequential representations are divided into different patches treated as token inputs for the Encoder, and average mean pooling compresses these into a single vector. Finally, the framework combines the representations of nodes  $u$  and  $v$ , utilizing a fully connected layer and *CrossEntropy* loss for link prediction, effectively capturing complex temporal information and long-term dependencies.

## I Datasheets for Datasets

This section answers questions about this work based on Datasheets for Datasets [15].

### I.0.1 Motivation

- **For what purpose was the dataset created?** Was there a specific task in mind? Was there a specific gap that needed to be filled? Please provide a description. TGB 2.0 is curated for realistic, reproducible and robust evaluation for temporal multi-relational graphs. Specifically there are four TKG datasets and four THG datasets, all designed for the dynamic link property prediction task.
- **Who created the dataset (e.g., which team, research group) and on behalf of which entity (e.g., company, institution, organization)?** `thgl-software` and `thgl-github` datasets are based on Github data collected by GH Arxiv. `thgl-forum` dataset is derived from user and subreddit interactions on Reddit. `thgl-myket` dataset was generated by the data team of the Myket Android application market. `tkgl-smallpedia` and `tkgl-wikidata` datasets are constructed from the Wikidata Knowledge Graph. `tkgl-polecat` is based on the POLitical Event Classification, Attributes, and Types (POLECAT) dataset. `tkgl-icews` is extracted from the ICEWS Coded Event Data. Detailed Dataset information is found in Section 4.
- **Who funded the creation of the dataset?** If there is an associated grant, please provide the name of the grantor and the grant name and number. Funding information is provided in Acknowledgement Section.

## I.0.2 Composition

- **What do the instances that comprise the dataset represent (e.g., documents, photos, people, countries)?** Are there multiple types of instances (e.g., movies, users, and ratings; people and interactions between them; nodes and edges)? Please provide a description.

The datasets primarily consist of nodes and edges in graph structures, representing various entities and their interactions:

- **thgl-software and thgl-github:** Nodes represent entities like users, pull requests, issues, and repositories. Edges indicate interactions among these entities.
- **thgl-forum:** Comprises user and subreddit nodes with edges for user replies and posts.
- **thgl-myket:** Features nodes as users and Android applications, with edges detailing install and update interactions. These datasets facilitate tasks like predicting future interactions or activities, utilizing a graph model to depict relationships in various domains such as software development, online communities, and socio-political contexts.
- **tkgl-smallpedia and tkgl-wikidata:** Includes Wikidata entities as nodes with edges as temporal and static relations.
- **tkgl-polecat and tkgl-icews:** Focus on socio-political actors as nodes with edges representing coded interactions.

- **How many instances are there in total (of each type, if appropriate)?** The detailed dataset statistics can be found in Section 4, Table 1.

- **Does the dataset contain all possible instances or is it a sample (not necessarily random) of instances from a larger set?** If the dataset is a sample, then what is the larger set? Is the sample representative of the larger set (e.g., geographic coverage)? If so, please describe how this representativeness was validated/verified. If it is not representative of the larger set, please describe why not (e.g., to cover a more diverse range of instances, because instances were withheld or unavailable).

The datasets are curated from the raw source. In some cases, some data filtering is done to remove low degree nodes. More details on dataset curation is found in Section 4. For thgl-myket, the data provider first focused on users interacting with the platform within a two-week period and randomly sampled 1/3 of the users. The install and update interactions for these users were then tracked for three months before and after the two-week period.

- **What data does each instance consist of?** “Raw” data (e.g., unprocessed text or images) or features? In either case, please provide a description.

The data contains the multi-relational temporal graph structure in the form of csv files as well as pre-generated negative samples for reproducible evaluation.

- **Is there a label or target associated with each instance?** If so, please provide a description.

We focus on the dynamic link property prediction (or link prediction) task thus the goal is to predict edges in the graph in the future. Therefore, no specific task labels are provided. We also provide both node and edge type information for THGs and edge type information for TKGs.

- **Is any information missing from individual instances?** If so, please provide a description, explaining why this information is missing (e.g., because it was unavailable). This does not include intentionally removed information, but might include, e.g., redacted text.

No, we provide information required for ML on temporal graphs.

- **Are relationships between individual instances made explicit (e.g., users’ movie ratings, social network links)?** If so, please describe how these relationships are made explicit.

The dataset themselves are classified into TKG or THG datasets, specified by the prefix tkgl or thgl. The relations between nodes are assigned with an edge type which is provided in the csv file.

950 • **Are there recommended data splits (e.g., training, development/validation, testing)?** If  
951 so, please provide a description of these splits, explaining the rationale behind them.  
952 Yes, the recommended split uses a 70/15/15 split, and the data is split chronologically.  
953 Please see Table 10 for details on the dataset splits.

954 • **Are there any errors, sources of noise, or redundancies in the dataset?** If so, please  
955 provide a description.  
956 No. However, datasets such as `tkgl-smallpedia` and `tkgl-wikidata` are extracted from  
957 Wikipedia where the knowledge is crowd-sourced, and thus may contain errors.

958 • **Is the dataset self-contained, or does it link to or otherwise rely on external resources**  
959 **(e.g., websites, tweets, other datasets)?** If it links to or relies on external resources, a) are  
960 there guarantees that they will exist, and remain constant, over time; b) are there official  
961 archival versions of the complete dataset (i.e., including the external resources as they  
962 existed at the time the dataset was created); c) are there any restrictions (e.g., licenses, fees)  
963 associated with any of the external resources that might apply to a dataset consumer? Please  
964 provide descriptions of all external resources and any restrictions associated with them, as  
965 well as links or other access points, as appropriate.  
966 The dataset is self-contained.

967 • **Does the dataset contain data that might be considered confidential (e.g., data that is**  
968 **protected by legal privilege or by doctor–patient confidentiality, data that includes the**  
969 **content of individuals’ nonpublic communications)?** If so, please provide a description.  
970 No, all data are gathered from public sources and we have anonymized user information  
971 where appropriate.

972 • **Does the dataset contain data that, if viewed directly, might be offensive, insulting,**  
973 **threatening, or might otherwise cause anxiety?** If so, please describe why.  
974 No.

975 • **Does the dataset identify any subpopulations (e.g., by age, gender)?** If so, please  
976 describe how these subpopulations are identified and provide a description of their respective  
977 distributions within the dataset.  
978 No.

979 • **Is it possible to identify individuals (i.e., one or more natural persons), either directly or**  
980 **indirectly (i.e., in combination with other data) from the dataset?** If so, please describe  
981 how.  
982 No, we have anonymized users’ information where appropriate.

983 • **Does the dataset contain data that might be considered sensitive in any way (e.g.,**  
984 **data that reveals race or ethnic origins, sexual orientations, religious beliefs, political**  
985 **opinions or union memberships, or locations; financial or health data; biometric or**  
986 **genetic data; forms of government identification, such as social security numbers;**  
987 **criminal history)?** If so, please provide a description.  
988 No.

### 989 I.0.3 Collection Process

990 • **How was the data associated with each instance acquired?** Was the data directly ob-  
991 servable (e.g., raw text, movie ratings), reported by subjects (e.g., survey responses), or  
992 indirectly inferred/derived from other data (e.g., part-of-speech tags, model-based guesses  
993 for age or language)? If the data was reported by subjects or indirectly inferred/derived from  
994 other data, was the data validated/verified? If so, please describe how.  
995 The data is extracted from online public data sources. The data described different relations  
996 between entities. The data sources are found in Appendix E and dataset details are in  
997 Section 4.



998 • **What mechanisms or procedures were used to collect the data (e.g., hardware apparatuses or sensors, manual human curation, software programs, software APIs)? How**  
999 **were these mechanisms or procedures validated?** Software APIs.  
1000  
1001 The datasets are curated via Python scripts written by authors, these can be found on the  
1002 project Github.

1003 • **If the dataset is a sample from a larger set, what was the sampling strategy (e.g.,**  
1004 **deterministic, probabilistic with specific sampling probabilities)?**  
1005 For `thgl-myket`, the users were selected randomly among the users that have interactions  
1006 with the platform in a two-week period. For `tkgl-smallpedia`, `tkgl-wikidata`, the  
1007 dataset was filtered by Wiki page ID. `thgl-software` and `thgl-github`, nodes with low  
1008 degrees are filtered out.

1009 • **Who was involved in the data collection process (e.g., students, crowdworkers, contrac-**  
1010 **tors) and how were they compensated (e.g., how much were crowdworkers paid)?**  
1011 Datasets are obtained from public online sources. For `thgl-myket` dataset, the interaction  
1012 record of users of the platform were collected, anonymized without any personal identifiers,  
1013 the data collection is discussed in the applications' privacy document. No crowdworkers are  
1014 involved.

1015 • **Over what timeframe was the data collected? Does this timeframe match the creation**  
1016 **timeframe of the data associated with the instances (e.g., recent crawl of old news articles)?**  
1017 **If not, please describe the timeframe in which the data associated with the instances was**  
1018 **created.**  
1019 Dataset timeframe and details are in Section 4.

1020 • **Were any ethical review processes conducted (e.g., by an institutional review board)?**  
1021 **If so, please provide a description of these review processes, including the outcomes, as well**  
1022 **as a link or other access point to any supporting documentation.**  
1023 No.

1024 • **Did you collect the data from the individuals in question directly, or obtain it via third**  
1025 **parties or other sources (e.g., websites)?**  
1026 All datasets are obtained via websites except for `thgl-myket` which were provided by the  
1027 the Myket Android application market team. Links to data sources are in Appendix E.

1028 • **Were the individuals in question notified about the data collection? If so, please describe**  
1029 **(or show with screenshots or other information) how notice was provided, and provide a link**  
1030 **or other access point to, or otherwise reproduce, the exact language of the notification itself.**  
1031 All datasets are curated from existing sources except `thgl-myket`. The data collection was  
1032 discussed in the applications' privacy document.

1033 • **Did the individuals in question consent to the collection and use of their data? If so,**  
1034 **please describe (or show with screenshots or other information) how consent was requested**  
1035 **and provided, and provide a link or other access point to, or otherwise reproduce, the exact**  
1036 **language to which the individuals consented.**  
1037 We use public data sources where data is already collected. The data collection was discussed  
1038 in the applications' privacy document.

1039 • **If consent was obtained, were the consenting individuals provided with a mechanism to**  
1040 **revoke their consent in the future or for certain uses? If so, please provide a description,**  
1041 **as well as a link or other access point to the mechanism (if appropriate).**  
1042 [N/A]

1043 • **Has an analysis of the potential impact of the dataset and its use on data subjects (e.g.,**  
1044 **a data protection impact analysis) been conducted? If so, please provide a description of**  
1045 **this analysis, including the outcomes, as well as a link or other access point to any supporting**  
1046 **documentation.**



1047 No, however the datasets are for temporal graph research purposes only, they are used to  
1048 benchmark existing methods and have been anonymized appropriately.

#### 1049 **I.0.4 Preprocessing/cleaning/labeling**

1050 • **Was any preprocessing/cleaning/labeling of the data done (e.g., discretization or bucket-**  
1051 **ing, tokenization, part-of-speech tagging, SIFT feature extraction, removal of instances,**  
1052 **processing of missing values)?** If so, please provide a description. If not, you may skip the  
1053 remaining questions in this section. No.

1054 • **Was the “raw” data saved in addition to the preprocessed/cleaned/labeled data (e.g., to**  
1055 **support unanticipated future uses)?** If so, please provide a link or other access point to  
1056 the “raw” data.

1057 [N/A]

1058 • **Is the software that was used to preprocess/clean/label the data available?** If so, please  
1059 provide a link or other access point.

1060 [N/A]

#### 1061 **I.0.5 Uses**

1062 • **Has the dataset been used for any tasks already?** If so, please provide a description.

1063 Yes, all datasets have been tested and benchmarked in this work, see Section 5.

1064 • **Is there a repository that links to any or all papers or systems that use the dataset?** If  
1065 so, please provide a link or other access point.

1066 Yes, all paper references are provided in this paper. All data sources are discussed in  
1067 Appendix E.

1068 • **What (other) tasks could the dataset be used for?**

1069 The THG datasets can be used for other tasks such as user churn prediction and more. The  
1070 TKG datasets can be used to study how knowledge changes over time.

1071 • **Is there anything about the composition of the dataset or the way it was collected**  
1072 **and preprocessed/cleaned/labeled that might impact future uses?** For example, is there  
1073 anything that a dataset consumer might need to know to avoid uses that could result in unfair  
1074 treatment of individuals or groups (e.g., stereotyping, quality of service issues) or other risks  
1075 or harms (e.g., legal risks, financial harms)? If so, please provide a description. Is there  
1076 anything a dataset consumer could do to mitigate these risks or harms?

1077 No, the datasets are for benchmarking purposes only and for researchers.

1078 • **Are there tasks for which the dataset should not be used?** If so, please provide a  
1079 description.

1080 No and we discuss potential negative impacts in Appendix C.

#### 1081 **I.0.6 Distribution**

1082 • **Will the dataset be distributed to third parties outside of the entity (e.g., company,**  
1083 **institution, organization) on behalf of which the dataset was created?** If so, please  
1084 provide a description.

1085 The dataset is released to the public for benchmarking on TKGs and THGs.

1086 • **How will the dataset will be distributed (e.g., tarball on website, API, GitHub)? Does**  
1087 **the dataset have a digital object identifier (DOI)?**

1088 Yes, the DOI for the project is <https://zenodo.org/records/11480522> (will point to  
1089 all future version as well). The dataset download links are provided in Appendix E. TGB 2.0  
1090 datasets are maintained via Digital Research Alliance of Canada (funded by the Government  
1091 of Canada).

1092 • **When will the dataset be distributed?** The dataset is already publicly available.

- **Will the dataset be distributed under a copyright or other intellectual property (IP) license, and/or under applicable terms of use (ToU)?** If so, please describe this license and/or ToU, and provide a link or other access point to, or otherwise reproduce, any relevant licensing terms or ToU, as well as any fees associated with these restrictions. The dataset licenses are listed in Appendix E.
- **Have any third parties imposed IP-based or other restrictions on the data associated with the instances?** If so, please describe these restrictions, and provide a link or other access point to, or otherwise reproduce, any relevant licensing terms, as well as any fees associated with these restrictions. All license terms are discussed in Appendix E.
- **Do any export controls or other regulatory restrictions apply to the dataset or to individual instances?** If so, please describe these restrictions, and provide a link or other access point to, or otherwise reproduce, any supporting documentation. No.

#### 1.0.7 Maintenance

- **Who will be supporting/hosting/maintaining the dataset?** TGB 2.0 datasets are maintained via Digital Research Alliance of Canada (funded by the Government of Canada).
- **How can the owner/curator/manager of the dataset be contacted (e.g., email address)?** The curator of the dataset (Shenyang Huang) can be contacted via email: shenyang.huang@mail.mcgill.ca
- **Is there an erratum?** If so, please provide a link or other access point. No
- **Will the dataset be updated (e.g., to correct labeling errors, add new instances, delete instances)?** If so, please describe how often, by whom, and how updates will be communicated to dataset consumers (e.g., mailing list, GitHub)? Yes, the datasets will be updated based on community feedback, mainly via the main TGB Github issues.
- **If the dataset relates to people, are there applicable limits on the retention of the data associated with the instances (e.g., were the individuals in question told that their data would be retained for a fixed period of time and then deleted)?** If so, please describe these limits and explain how they will be enforced. No.
- **Will older versions of the dataset continue to be supported/hosted/maintained?** If so, please describe how. If not, please describe how its obsolescence will be communicated to dataset consumers. Any new dataset version will be announced on Github and the TGB website.
- **If others want to extend/augment/build on/contribute to the dataset, is there a mechanism for them to do so?** If so, please provide a description. Will these contributions be validated/verified? If so, please describe how. If not, why not? Is there a process for communicating/distributing these contributions to dataset consumers? If so, please provide a description.  
Yes, first they can reach out by email to shenyang.huang@mail.mcgill.ca or raise a Github issue.
